1 TITLE PAGE

2  
3 Marmoset monkeys (*Callithrix jacchus*) develop eosinophilic airway inflammation after house dust  
4 mite exposure

5  
6 Condensed title: Eosinophilic airway inflammation in marmosets

7  
8 F Dahlmann<sup>1,2¶\*</sup>, C Curths<sup>1,2¶</sup>, J Wichmann<sup>1,2</sup>, S Jimenez Delgado<sup>1</sup>, E Twisterling<sup>1,2</sup>, YS Kap<sup>3</sup>, N van Driel<sup>3</sup>,  
9 BA't Hart<sup>3</sup>, Y Knauf<sup>2</sup>, T Becker<sup>2</sup>, S Dunker<sup>1</sup>, H Windt<sup>1</sup>, M Bleyer<sup>2</sup>, FJ Kaup<sup>2</sup>, K Sewald<sup>1&</sup>, A Braun<sup>1&</sup>, S  
10 Knauf<sup>1,2,4&</sup>

11  
12 <sup>1</sup> Fraunhofer Institute for Toxicology and Experimental Medicine; Biomedical Research in Endstage and  
13 Obstructive Lung Disease Hannover (BREATH), Member of the German Center for Lung Research,  
14 Hannover, Germany

15  
16 <sup>2</sup> Pathology Unit, German Primate Center GmbH, Leibniz-Institute for Primate Research, Goettingen,  
17 Germany

18  
19 <sup>3</sup> Department of Immunobiology, Biomedical Primate Research Center, Rijswijk, The Netherlands

20  
21 <sup>4</sup> Department for Animal Sciences, Georg-August-University, Goettingen, Germany

22  
23 ¶, & contributed equally

24  
25 \* Corresponding author

26 E-mail: [franziska.dahlmann@item.fraunhofer.de](mailto:franziska.dahlmann@item.fraunhofer.de)

27 ABSTRACT

28 Background: Extensive analysis of eosinophilic airway inflammation in human-relevant animal models is  
29 required to test novel, human-specific pharmaceuticals. This requires species, which show high genetic  
30 homology to humans such as non-human primates. Efficacy assessment of novel human-specific biologicals  
31 in eosinophilic airway inflammation is currently performed in the cost-intensive macaque asthma model.

32  
33 Objective: The present study investigated whether marmoset monkeys (*Callithrix jacchus*), a small-bodied  
34 non-human primate species from the New World, develop eosinophilic airway inflammation in response to  
35 house dust mite allergen exposure (HDM, *Dermatophagoides pteronyssinus*).

36  
37 Methods: Marmoset monkeys were sensitized against HDM by subcutaneous (s.c.) injection and subsequent  
38 intratracheal (i.t.) HDM aerosol challenges. Airway and systemic immunologic reactions were monitored  
39 and sensitivity towards glucocorticoid therapy was assessed. The pulmonary immunologic response was  
40 analyzed by repetitive bronchoalveolar lavage (BAL).

41  
42 Results: Bronchoalveolar lavage fluid (BALF) exhibited increased levels of eosinophils, mast cells, and  
43 lymphocytes, as well as interleukin (IL)-13 after HDM challenges, compared to negative controls. The  
44 systemic immunologic response was assessed in peripheral blood mononuclear cells derived from sensitized  
45 animals, which secreted increased IL-13 and IFN- $\gamma$  upon allergen stimulation in contrast to non-sensitized  
46 negative control animals. Although IgE was not detectable, HDM-specific serum IgG was elevated in  
47 sensitized animals. Both airway and systemic responses were reduced by treatment with glucocorticoids.  
48 However, lung function and pathological analyses did not reveal significant differences between groups.

49  
50 Conclusion: In conclusion, marmoset monkeys developed a mild HDM-induced eosinophilic airway  
51 inflammation useful for efficacy testing of novel human-specific biologicals.

52

## 53 INTRODUCTION

54 About 235 million patients worldwide suffer from eosinophilic allergic inflammation like asthma and  
55 require therapeutic interventions [1]. Current therapeutics comprise glucocorticoids and long-acting beta-  
56 agonists, which in most cases efficiently control mild and moderate asthma. Severe asthma, however, is  
57 frequently therapy-resistant, and only a few monoclonal antibodies such as omalizumab, mepolizumab, and  
58 reslizumab have been approved for treatment [2]. The preclinical development of monoclonal antibodies  
59 and other human-specific biologicals directed against a particular target requires high homology in rodents.  
60 If cross-reactivity is not given, non-human primates (NHPs) are often the species of choice.

61  
62 To analyze the efficacy of human-specific therapeutics in NHP models of asthma, symptoms and pathology  
63 have to coincide with human asthma patients. In patients, asthma is characterized by localized airway  
64 reactions, an increase of inflammatory markers, and airway obstruction as a result of pathological changes  
65 [3]. Sensitization is triggered by inhaled allergens like house dust mite allergen (HDM), leading to an influx  
66 of inflammatory cells into the airways. Inflammatory cells, which typically increase in airways of asthmatic  
67 patients, include eosinophils and lymphocytes (reviewed in [4]), accompanied by the T-helper 2 (Th2)  
68 cytokines IL-4, IL-5, and IL-13. Systemic markers of asthma, which can be detected in blood, include  
69 allergen-specific IgE and Th2-derived interleukins (reviewed in [5]). Airway obstruction is determined by  
70 lung function analysis and characterized by an early airway response (EAR) immediately after allergen  
71 exposure and increased airway hyperresponsiveness (AHR) towards unspecific stimuli such as  
72 methacholine [6]. As an alternative to *in vivo* lung function, these changes can also be observed in *ex vivo*  
73 precision-cut lung slices (PCLS) [7]. Underlying inflammation-induced chronic pathological changes are  
74 characterized by goblet cell metaplasia, subepithelial fibrosis, smooth muscle hypertrophy, and angiogenesis  
75 [8].

76  
77 Among NHPs, asthma has extensively been investigated in cynomolgus (*Macaca fascicularis*) and rhesus  
78 macaques (*Macaca mulatta*). Both macaque species develop eosinophilic airway diseases after sensitization

79 and repetitive challenge with HDM [9-12]. Similarly, HDM-specific IgE is detected in serum [13, 14] and  
80 systemic markers of Th2-mediated inflammation are released from peripheral blood mononuclear cells  
81 (PBMC) after stimulation [10, 11]. Macaques show HDM-mediated airway obstruction [9-11] and an  
82 increased AHR in lung function analyses after methacholine (MCh) exposure [10, 11, 15], which can also  
83 be observed in *ex vivo* PCLS [16]. Moreover, pathological changes include goblet cell hyperplasia, epithelial  
84 hypertrophy, thickening of the basement membrane, and eosinophilic infiltrations [9, 10, 17], comparable  
85 to human patients.

86  
87 Other NHPs that have been investigated in inflammatory airway disease research are marmoset monkeys  
88 (*Callithrix jacchus*) (reviewed in [18]), which are smaller in body size and therefore offer a cost-efficient  
89 alternative to macaques. Marmoset monkeys developed AHR and neutrophilic airway inflammation after  
90 intratracheal challenge with lipopolysaccharide, indicating the general suitability of this species in airway  
91 disease research. Moreover, the neutrophilic inflammation was sensitive towards pretreatment with  
92 glucocorticoids and a phosphodiesterase-4 inhibitor, both *in vivo* and *ex vivo* [19, 20]. Marmosets are used,  
93 when macaques show less cross-reactivity towards a specific target. This was, for example, the case for the  
94 monoclonal antibody canakinumab [21, 22].

95  
96 We hypothesize that the sensitization of marmosets with HDM leads to eosinophilic airway disease similar  
97 to human asthma, which can be used for efficacy assessment of monoclonal antibodies against human  
98 asthma. Herein we report the induction of respiratory eosinophilic inflammation in marmoset after  
99 sensitization with HDM.

100

101 METHODS

102 *Animals and anesthesia*

103 Care and housing of marmoset monkeys at the German Primate Center were in accordance with the  
104 European and national directives for animal protection (2010/63/EU, §7-9/TierSchG/7833-3). The study  
105 was approved under reference number “AZ 33.9-42502-04-14/1421” by the German Lower Saxony Federal  
106 State Office for Consumer Protection and Food Safety and had the institutional reference number “Int. 1/14”  
107 at the German Primate Center. Twenty-one male and six female marmoset monkeys were preselected by  
108 bronchoscopy and were grouped according to Table 1. Mean animal weight was 409.0±7.5 g, with an  
109 average age of 4.6±0.2 years (mean±SEM). For procedures requiring anesthesia, 0.3 mg/kg body weight  
110 (BW) diazepam (Diazepam-ratiopharm, Ratiopharm) and 10 mg/kg BW alfaxalone (Alfaxan, Vétquinol)  
111 were injected intramuscular (i.m.). During pulmonary function testing, anesthesia was maintained with  
112 isoflurane (Baxter). Information regarding care is provided in the supplementary methods. Good Veterinary  
113 Practice was applied whenever animals were handled.

114

115 **Table 1: Animals used in the study.** Animals were separated into three different groups (negative control,  
116 sham-treated, budesonide) according to age and body weight (mean values +/- SEM) at the beginning of the  
117 study (stratified randomization). Each group consisted of seven male and two female animals. House dust  
118 mite allergen (HDM) doses for sensitization and challenge were 10 and 5 µg, respectively. Budesonide-  
119 therapy was performed with 0.33 mg/kg body weight. For more details, see Table 2.

| Animal group     | n | Sensitization<br>(week 1-6) | Challenge<br>(week 11-13) | Treatment<br>(week 18-19) | Age<br>[years] | Weight<br>[g] |
|------------------|---|-----------------------------|---------------------------|---------------------------|----------------|---------------|
| Negative control | 9 | Sham <sup>1</sup>           | Sham <sup>2</sup>         | Vehicle <sup>3</sup>      | 4.6±0.4        | 422.3±13.8    |
| Sham-treated     | 9 | 10 µg HDM<br>per injection  | 5 µg HDM<br>per challenge | Vehicle <sup>3</sup>      | 5.0±0.5        | 391.8±8.8     |
| Budesonide       | 9 |                             |                           | 0.33 mg/kg<br>budesonide  | 4.8±0.3        | 413.2±14.6    |

120 <sup>1</sup> 1.5 mg alum adjuvant in 0.9 % saline <sup>2</sup> 0.9 % saline <sup>3</sup> PBS

121

122 *Study Design*

123 Animals were allowed to acclimatize to the experimental housing conditions for at least two weeks. Eighteen

124 healthy marmosets were sensitized against HDM six times once a week by subcutaneous (s.c.) injection of

125 10 µg *Dermatophagoides pteronyssinus* crude mite extract (Greer) with 1.5 mg adjuvant (Imject™ Alum,

126 Thermo Scientific™) (Table 1, Table 2). HDM extract contained 7.3 endotoxin units per µg of protein.

127 Negative control animals received only adjuvant (n=9). Before and after sensitization, skin prick tests were

128 performed as described in the supplementary material. Four weeks after sensitization an aerosol challenge

129 phase followed with six intratracheal (i.t.) applications of 5 µg allergen over three weeks. For i.t.

130 administration, a MicroSprayer (Penn Century) was inserted into a custom-made orotracheal tube as

131 described elsewhere [19]. The last challenge was performed only in a subset of animals (n=17), utilizing a

132 lung function measurement device [20]. All remaining animals received HDM via the MicroSprayer. At this

133 time point, even the negative control animals received allergen. At the end of the study, four weeks after the

134 last challenge, the therapeutic intervention was performed i.t. on three consecutive days with either sham

135 substance (PBS, n=17) or budesonide (0.33 mg/kg, acis Arzneimittel, n=9), followed by a final HDM

136 challenge (5 µg) in all animals. After end-point lung function testing and subsequent bronchoalveolar lavage

137 (BAL), animals were humanely euthanized to perform *ex vivo* and pathological analyses.

138

139 **Table 2: Study design.** The three phases of the study are indicated as black bars. All animals underwent  
 140 the described procedures at the respective time points (grey boxes), except for skin prick testing and lung  
 141 function after house dust mite (HDM) exposure in week 13. Subcutaneous (s.c.) sensitization was performed  
 142 once per week, whereas intratracheal (i.t.) challenge was performed twice weekly. Animals were treated i.t.  
 143 according to Table 1A on three consecutive days. MCh=Methacholine

| Procedure                     | Week |   |   |   |   |   |   |   |   |   |    |    |    |    |    |    |    |    |    |    |
|-------------------------------|------|---|---|---|---|---|---|---|---|---|----|----|----|----|----|----|----|----|----|----|
|                               | 0    | 1 | 2 | 3 | 4 | 5 | 6 | 7 | 8 | 9 | 10 | 11 | 12 | 13 | 14 | 15 | 16 | 17 | 18 | 19 |
| Sensitization (s.c.)          |      | ■ | ■ | ■ | ■ | ■ | ■ |   |   |   |    |    |    |    |    |    |    |    |    |    |
| Challenge (i.t.)              |      |   |   |   |   |   |   |   |   |   |    | ■  | ■  | ■  |    |    |    |    |    |    |
| Treatment (i.t.) <sup>1</sup> |      |   |   |   |   |   |   |   |   |   |    |    |    |    |    |    |    |    |    | ■  |
| Skin prick test               | ■    |   |   |   |   |   |   | ■ |   |   |    |    |    | ■  |    |    |    |    |    |    |
| Blood sampling <sup>2</sup>   | ■    |   |   |   |   |   |   | ■ |   |   | ■  |    |    | ■  |    |    |    | ■  |    | ■  |
| Lung function (MCh)           | ■    |   |   |   |   |   |   |   |   |   |    |    |    | ■  |    |    |    |    | ■  | ■  |
| Lung function (HDM)           |      |   |   |   |   |   |   |   |   |   |    |    |    | ■  |    |    |    |    |    |    |
| Bronchoalveolar lavage        |      |   |   |   |   |   |   |   |   |   | ■  |    |    | ■  |    |    |    |    | ■  | ■  |
| HDM challenge                 |      |   |   |   |   |   |   |   |   |   |    |    |    |    |    |    |    |    |    | ■  |
| Necropsy                      |      |   |   |   |   |   |   |   |   |   |    |    |    |    |    |    |    |    |    | ■  |
| Ex vivo broncho-constriction  |      |   |   |   |   |   |   |   |   |   |    |    |    |    |    |    |    |    |    | ■  |

144 <sup>1</sup> Treatment was performed on three consecutive days

145 <sup>2</sup> Blood samples were used for PBMC restimulation assays and serum analyses

146

147 *Bronchoalveolar lavage*

148 Video-assisted BAL was performed in anesthetized marmosets as described previously [20]. Briefly, a  
 149 laryngoscope (HEINE Standard F.O. Classic+ Miller 00, Heine) was used to insert the custom-made  
 150 bronchoscope (Karlheinz Hinze Optoengineering) into one of the main bronchi. The right (pre- and post-  
 151 challenge) or the left (pre- and post-therapy) lung was flushed twice with pre-warmed 3 ml sterile saline  
 152 solution (0.9 % NaCl, WDT). Protease inhibitor cocktail (Sigma-Aldrich) was immediately added to the  
 153 recovered BAL fluid (BALF), which was centrifuged for 5 min at 340 ×g at 4 °C. BALF supernatants were

154 stored at -80°C until further processing. BALF pellets were resuspended in phosphate-buffered saline (PBS)  
155 and centrifuged by a Shandon Cytospin (Thermo Scientific™) to generate thin-layer cell preparations  
156 (“cytospots”). Cytospots were stained by May-Gruenwald Giemsa stain and mast cells were detected  
157 immunohistochemically (monoclonal mouse anti-human mast cell tryptase, Dako). Staining protocols and  
158 further details can be found in the supplementary material. Total and differential cell counts were evaluated  
159 by microscopic counting of 200 cells per sample.

160

#### 161 *Blood sampling, PBMC isolation, and restimulation*

162 In conscious animals, blood was collected from the *Vena femoralis* and immediately transferred into EDTA  
163 (Vacutainer Glass K<sub>3</sub> EDTA tubes, BD) or serum tubes (Vacurette Serum Clot Activator tubes, Greiner Bio-  
164 One), respectively. EDTA blood was processed for PBMC isolation and was additionally analyzed in an  
165 automated hematology system (Advia 2120, Siemens). Serum was centrifuged (15 min, 2000 ×g, room  
166 temperature) and stored at -20 °C for immunoglobuline and C-reactive protein (CRP) quantification  
167 (Dimension Xpand Plus, Siemens).

168 Whole blood was diluted with PBS (PAN™ Biotech) and loaded on Lymphoprep™ medium (Stemcell™  
169 Technologies). Tubes were centrifuged (20 min, 800 ×g, room temperature) and the mononuclear cell layer  
170 was transferred to PBS and washed twice. PBMC pellets were resuspended in cell culture medium (RPMI  
171 1640, PAN™ Biotech) that contained 10 % fetal bovine serum (FBS, Biochrom AG) and 1 %  
172 Penicillin/Streptomycin (PAN™ Biotech). PBMC were incubated overnight in 96-well microplates  
173 (Cellstar, Greiner Bio-One) with 2x10<sup>5</sup> cells per well at 37 °C and 5% CO<sub>2</sub>. Thereafter, PBMCs were  
174 stimulated with 10 µg/ml HDM for 96 h. Controls involved medium or HDM plus 50 µg/ml dexamethasone  
175 (Dexa-ratiopharm, Ratiopharm GmbH). Supernatants were stored at -80 °C and were used for cytokine  
176 detection by ELISA.

177



178 *ELISA*

179 Supernatants from BALF and PBMC restimulation assays were analyzed for IL-13 and IFN- $\gamma$  levels, using  
180 commercially available marmoset-specific ELISA (Marmoset IL-13 and IFN- $\gamma$  ELISA Ab pair, U-CyTech).  
181 Assays were performed according to the manufacturer's protocols. Detection limits were set to lower limits  
182 of quantification and revealed  $\leq 0.64$  pg/ml (IL-13) and  $\leq 3.82$  pg/ml (IFN- $\gamma$ ) for PBMC samples and 0.32  
183 pg/ml (IL-13) and  $\leq 0.70$  pg/ml (IFN- $\gamma$ ) for BAL samples.

184 Allergen-specific IgG was detected using a custom-made ELISA. Briefly, 96 well plates (Greiner Bio-One  
185 B.V.) were coated with 5  $\mu$ g/ml HDM extract overnight and blocked with PBS supplemented with 2 % BSA  
186 at 37 °C for 1 h. Samples were diluted 1:100 and incubated for 2 h at 37 °C. A polyclonal alkaline  
187 phosphatase-conjugated rabbit-anti-human IgG (Abcam<sup>®</sup>), diluted 1:2000 in 1 % BSA in PBS was added  
188 for 1 h at 37 °C. Substrate p-Nitrophenyl phosphate (SIGMAFAST<sup>™</sup>, Sigma-Aldrich) was added for 20  
189 min. Optical density (OD) was subsequently measured at 405 nm (BioTek Instruments Inc.). Washing steps  
190 were performed using 0.05 % tween 20 in PBS. Antibody levels are given as arbitrary units (AU), derived  
191 from comparison to standard curves from control marmoset serum. The Ab content in the pooled plasma  
192 was defined at 2.500 arbitrary units, and newly collected ELISA data were fitted to a four-parameter  
193 hyperbolic function using the homemade ADAMSEL program developed by Dr. E. Remarque (Biomedical  
194 Primate Research Centre, the Netherlands).

195

196 *Lung function measurement*

197 MCh tests were conducted before sensitization, after the challenge phase, and prior and after therapy,  
198 whereas *in vivo* reaction against HDM was only assessed after challenge in a subset of animals. *In vivo*  
199 assessment of lung function was performed as previously described [20]. Briefly, anesthetized  
200 spontaneously breathing animals were orotracheally intubated and connected to the lung function device.  
201 Pulmonary parameters including lung resistance ( $R_L$ ) and dynamic compliance ( $C_{dyn}$ ) were recorded to  
202 assess AHR by exposure to MCh. Both parameters were described as the provocative dose (PD) of MCh  
203 and are analyzed as increased  $R_L$  150% above baseline ( $PD_{150R_L}$ ) or decreased  $C_{dyn}$  50% below baseline

204 (PD<sub>50</sub>C<sub>dyn</sub>). Reduced PD values are indicative for AHR. Animals were provoked with either increasing  
205 aerosol doses of 0.25 µg to maximal 64 µg MCh (acetyl-β-methylcholine chloride, Sigma–Aldrich) or a  
206 single application of 5 µg HDM. MCh application was stopped when R<sub>L</sub> reached 150 % above the  
207 individual’s baseline. Subsequently, animals received 0.1 mg salbutamol (Ratiopharm) to smoothen  
208 recovery. For lung function analysis Notocord-hem™ software (NOTOCORD Systems, Croissy Sur Seine,  
209 France) was used.

210

### 211 *Necropsy, histopathology, and immunohistochemistry*

212 Euthanasia was performed in deep anesthesia using an intracardial injection of a lethal dose of pentobarbital  
213 sodium (Narcoren, Merial). Post-mortem, the thoracic cavity was opened and the thoracic content was  
214 removed en bloc. The right caudal lung lobe was removed, cannulated and instilled with 4% phosphate-  
215 buffered formaldehyde at 25-cm hydrostatic pressure. After floating fixation for at least 24 h, the right  
216 caudal lung lobe was embedded in paraffin and further processed by hematoxylin and eosin (H&E) stain  
217 and secretory cell detection by immunohistochemistry (IHC). Further details are provided in Supplementary  
218 Methods.

219

### 220 *Ex vivo bronchoconstriction of PCLS*

221 PCLS were generated from five animals per group after therapy as previously described [16]. Briefly, the  
222 left lung was filled with 1.5 % low-gelling temperature agarose (Sigma-Aldrich) in cell culture medium  
223 (MEM HEPES Modification, Sigma-Aldrich) and hardened in ice-cold PBS. PCLS of 8 mm diameter with  
224 cross-sectioned airways were generated using a Krumdieck tissue slicer (Alabama Research and  
225 Development) and incubated in DMEM F12 (Gibco) including 100 units/ml penicillin, 100 µg/ml  
226 streptomycin, and 25 mM HEPES (Lonza) at 37 °C and 5 % CO<sub>2</sub>. The degree of bronchoconstriction towards  
227 10 µg/ml HDM or 10<sup>-7</sup>-10<sup>-3</sup> M MCh was monitored using video microscopy (Stereo microscope Zeiss  
228 Discovery V8, Digital video camera AxioCam Icm1 and AxioVision Discovery 4.8.2 Software, Zeiss).

229 Percentage differences related to initial airway areas were calculated using the ImageJ 1.44p software  
230 (National Institutes of Health).

231

232 *Statistics*

233 Statistical analyses were performed using Prism 6.0 (GraphPad Software). Data are shown as means with a  
234 standard error of the mean (SEM), whereas non-normally distributed data are depicted as box-and-whisker  
235 plots including medians. Box-and-whisker boxes represent 25th to 75th percentiles and whiskers show  
236 maximum and minimum values. Statistical significance was determined employing parametric (paired,  
237 unpaired t-test) or non-parametric tests (Wilcoxon matched-pairs signed rank test, Mann-Whitney-  
238 Wilcoxon test). Non parametric test was used when data were not Gaussian distributed. Correlation analyses  
239 employed Pearson correlation coefficients (r). We regarded P-values of  $\leq 0.05$  as statistically significant.

240

## 241 RESULTS

### 242 *Respiratory inflammatory response*

243 To analyze the respiratory inflammatory response, marmoset monkeys underwent BAL before and after the  
244 challenge as well as before and after the treatment. After HDM challenge sensitized animals showed  
245 significantly increased eosinophil ( $8.4 \times 10^4$  cells/ml) and mast cell numbers ( $1.8 \times 10^3$  cells/ml) compared  
246 to the negative control animals ( $1.4 \times 10^4$  cells/ml and  $2.9 \times 10^1$  cells/ml, respectively) (Fig. 1A). In contrast,  
247 negative control animals revealed elevated BALF neutrophil numbers ( $2.1 \times 10^4$  cells/ml) compared to  
248 sensitized animals ( $9.5 \times 10^3$  cells/ml). In BALF supernatant, IL-13 was elevated in HDM sensitized (0.66  
249 vs. 1.02 pg/ml) (Fig. 1B), but not in negative control animals. BALF IFN- $\gamma$  levels were not changed between  
250 sensitized and non-sensitized animals (Fig. 1C).

251  
252 HDM-sensitized animals were treated with budesonide. In budesonide-treated animals, eosinophils were  
253 decreased compared to untreated animals ( $2.7 \times 10^4$  cells/ml) (Fig. 2B). In contrast to the sham-treated  
254 animals, neutrophils were elevated in budesonide-treated animals ( $7.9 \times 10^4$  cells/ml) (Fig. 2C).  
255 Additionally, a reduction of mast cells ( $7.3 \times 10^2$  cells/ml vs.  $5.4 \times 10^2$  cells/ml) and lymphocytes ( $1 \times 10^4$   
256 cells/ml vs.  $7.1 \times 10^3$  cells/ml) were observed in budesonide-treated animals (Fig. 2D and E). No differences  
257 were observed for macrophages, IL-13, and IFN- $\gamma$  levels before and after therapeutic intervention.

258  
259 The allergen response towards HDM was tested by skin prick testing. Before sensitization, cutaneous  
260 reactivity tests were negative except for one out of 27 animals. Following sensitization, reactivity towards  
261 allergen was not observed in any negative control animal, whereas seven sensitized animals developed  
262 wheals against HDM (Supplementary Table S2). A correlation between positive skin prick tests and  
263 eosinophils in BAL was not observed.

264  
265 Histologically, there was minimal to moderate peribronchial and peribronchiolar inflammation in the right  
266 lungs of all animals without correlation to treatment or group. The inflammatory cell infiltrate mainly

267 consisted of lymphocytes as well as eosinophilic and neutrophilic granulocytes. There were no differences  
268 in distribution, intensity, and composition of the inflammatory reaction across all groups. An increase of  
269 tissue eosinophils or signs of hypercrinism in the sham-treated group compared to the negative control group  
270 were not noticed.

271  
272 Immunohistochemical examination revealed no obvious intergroup differences in the expression of  
273 MUC5AC of the airway epithelial. In contrast, there seemed to be a decrease in the number of CCSP positive  
274 cells in the intrapulmonary airway epithelium of sham-treated animals, compared to negative control  
275 animals and the budesonide-treated group (Supplement Fig. 4).

276  
277 *Systemic response: cytokines, HDM-specific IgG in serum*

278 The systemic response was analyzed by measurement of peripheral leukocytes, immunoglobulin, and  
279 cytokine release of PBMC. Leukocyte blood cell count ( $4.6 \times 10^3/\mu\text{l}$  vs.  $6.1 \times 10^3/\mu\text{l}$ ) and serum CRP levels  
280 ( $7.6 \text{ mg/l}$  vs.  $8.6 \text{ mg/l}$ ) were significantly increased after challenge in sensitized animals (Supplement Fig.  
281 S3). Despite several attempts, total IgE and HDM-specific IgE were not detected in the blood of sensitized  
282 marmosets. However, we could show that serum HDM-specific IgG levels increased significantly after  
283 sensitization and challenge ( $1.7$  to  $5.1 \text{ AU}$ ) (Fig. 3). HDM-specific IgG was not present in the negative  
284 control animals.

285  
286 Cytokine release was analyzed from PBMC after *in vitro* restimulation with the allergen HDM. Whereas  
287 PBMC of negative control animals did not show a release of IL-13 or IFN- $\gamma$ , PBMC of sensitized animals  
288 showed a significant increase of IL-13 ( $67.1 \text{ pg/ml}$ ) and IFN- $\gamma$  ( $29.3 \text{ pg/ml}$ ) 96 h after HDM stimulation  
289 compared to medium controls (Fig. 4A and B). It was possible to attenuate these effects by adding the  
290 glucocorticoid dexamethasone to the cultures (Fig. 4A and B). Similar results were obtained after challenge  
291 and therapy (Supplementary Fig. S1).

292

293 *Functional lung response*

294 Lung function analysis included assessment of AHR by exposure to MCh at baseline, after challenge and  
295 before and after treatment. Reduced PD values are indicative of AHR. At baseline, there were no marked  
296 differences in PD<sub>150</sub>R<sub>L</sub> between the different study groups (negative control 0.72 µg, sensitized animals 0.73  
297 µg), which was equally the case after the challenge phase (Supplementary Table S1). Similar results were  
298 obtained for PD<sub>50</sub>C<sub>dyn</sub>. The presence of EAR towards HDM was analyzed immediately after the sixth  
299 challenge, depicted as percent change of R<sub>L</sub> and C<sub>dyn</sub> from baseline, but did not reveal differences. These  
300 results indicate an absence of both AHR and EAR in sensitized compared to negative control animals.

301  
302 To further investigate reactivity towards the allergen, bronchoconstriction was analyzed using PCLS. Only  
303 lung tissue from sham-treated, sensitized animals showed a contraction after HDM exposure (22.7 %; Fig.  
304 5). AHR towards MCh, as shown by EC<sub>50</sub>, was more pronounced in PCLS that were received from sham-  
305 treated, sensitized animals compared to negative control animals. This, however, was not significant. PCLS  
306 contraction (% airway area) upon HDM-stimulation correlated with BALF eosinophil levels (Supplement  
307 Fig. 2).

308 DISCUSSION

309 We analyzed whether marmosets develop asthma-like pathology after repeated HDM exposure and  
310 investigated sensitivity towards treatment. HDM allergen is frequently used in NHP and rodent models of  
311 asthma (reviewed in [23]) due to its relevance in human allergic asthma. We applied a systemic route of  
312 sensitization with a dose of 10 µg HDM extract, followed by intratracheal challenges with 5 µg aerosolized  
313 HDM extract in adult animals. The route was similar to other NHP models [11], although alternative  
314 exposure routes have also been reported, such as intranasal exposure [9]. The allergen challenge is required  
315 to induce respiratory inflammation [9-11, 23, 24]. The allergen amounts of HDM that were used in this  
316 study corresponded to what has been used in other NHP studies [25]. In our marmosets, the time of exposure  
317 resulted in mild airway inflammation. Most likely and based on a comparable NHP study [9], higher  
318 amounts of the allergen might have resulted in a more severe asthmatic condition.

319  
320 Eosinophils, lymphocytes, and mast cell numbers are increased in the sputum and BAL of asthmatic patients  
321 [26]. Depending on the phenotype and severity of asthma, neutrophils are also increased (reviewed in [27]).  
322 Likewise, in the lungs of asthmatic marmosets, respiratory inflammation was dominated by eosinophils,  
323 mast cells, and lymphocytes in BAL. Other pathological changes such as goblet cell metaplasia, smooth  
324 muscle hypertrophy, or subepithelial fibrosis were not seen. Yet, infiltration of lung tissue with eosinophils,  
325 neutrophils, and lymphocytes was also observed in other asthmatic NHP models [9-12, 28-30].

326  
327 PBMCs of asthmatic marmosets showed an increase of IL-13, IFN-γ, HDM-specific IgG, and CRP after  
328 restimulation with HDM *ex vivo*. Detection of increased IL-13 and IFN-γ in sensitized marmosets is in line  
329 with observations in human studies [31].

330  
331 We were not able to detect IgE in HDM sensitized marmosets. Moreover, there is no commercial assay  
332 available for marmoset IgE and the combination of different antibodies in a self-made ELISA was not  
333 successful. As a result, we are currently not able to conclude that marmoset IgE does not play a role in our

334 HDM sensitized marmosets. Yet, HDM sensitized marmosets showed increased levels of IgG directed  
335 against HDM. This has also been described for other NHP asthma models [10, 25] as well as increased IgG  
336 levels are reported from human asthmatics [32, 33]. We observed correlations between HDM-specific serum  
337 IgG and BALF eosinophils in sensitized marmosets (Supplementary Figure S2), which may link  
338 sensitization to respiratory inflammation. Besides the increase of antibody titers, the humoral response  
339 showed an increase of CRP in allergic animals (Supplementary Figure S3). As an acute-phase protein, CRP  
340 is generally induced by IL-6 and has been reported to be increased in allergic patients [34]. CRP is indicative  
341 of early systemic pro-inflammatory response in humans as well as marmosets.

342  
343 The protocol for sensitization used in our study did not lead to impairment of *in vivo* lung function. Neither  
344 an unspecific AHR nor an EAR was observed, in contrast to what has been published in several other NHP  
345 models [9, 10, 13, 35]. However, marmosets have been shown to react with impaired lung function in a  
346 model of LPS-induced respiratory inflammation [18]. Nevertheless, EAR measured *ex vivo* by video  
347 microscopy in PCLS from allergic marmosets showed a decrease in airway area after HDM exposure. This  
348 confirms atopy in the tissue of the allergic animals. PCLS of animals pre-treated with a glucocorticoid did  
349 not show a reduction in airway area anymore, indicating an efficient therapeutic intervention.

350  
351 **CONCLUSION**  
352 We report a marmoset asthma model with allergen induced mild respiratory inflammation and increased IL-  
353 13 in BAL. Compared to the old world monkey models, our marmoset model is an attractive alternative for  
354 pre-clinical drug testing of human-specific therapeutics that target the asthma-related features of the  
355 marmoset model.

356  
357 **ACKNOWLEDGEMENTS**  
358 We thank K. Lampe for veterinary assistance, N. Bertram and M. Ellrodt for taking care of the animals, A.  
359 Heistermann for technical support, C. Boike, L. Erffmeier, L. Hummel, and all other members of the former



360 Pathology Unit at the German Primate Center for technical assistance. We acknowledge the support in  
361 experiments at Fraunhofer by O. Danov, S. Konzok, H. Obernolte, S. Schindler, and E. Spies. Moreover,  
362 we thank HG. Hoymann, A. Eggel, Sophie Thiolloy, S. Wronski, E. Schelegle, K. Haanstra, M. Müller, J.  
363 Hohlfeld and R. Pabst for valuable discussion and J. Veuskens for support. We likewise thank the members  
364 of the Primomed Consortium for fruitful discussions.

365

#### 366 CONFLICT OF INTEREST

367 The study was funded by SMEs. These SMEs had no role in the study design, conduct of the study as well  
368 as the outcome.

369

#### 370 FUNDING

371 This project has received funding from the European Union's Seventh Framework Programme for research,  
372 technological development and demonstration under grant agreement number 606084 with the project title  
373 "Primomed - Use of PRIMate MOdels to support translational MEDicine and advance disease modifying  
374 therapies for unmet medical needs".

375 REFERENCES

- 376 1. World Health Organization (WHO). Asthma Fact sheet N°307 [Internet]. 2013 [accessed 7 March  
377 2007]. Available from: <http://www.who.int/mediacentre/factsheets/fs307/en/>.
- 378 2. Brusselle G, Bracke K. Targeting immune pathways for therapy in asthma and chronic obstructive  
379 pulmonary disease. *Annals of the American Thoracic Society*. 2014;11 Suppl 5:S322-8. Epub 2014/12/20.  
380 doi: 10.1513/AnnalsATS.201403-118AW. PubMed PMID: 25525740.
- 381 3. Global Initiative for Asthma. Global Strategy for Asthma Management and Prevention [Report].  
382 2016. Available from: [www.ginasthma.org](http://www.ginasthma.org).
- 383 4. Howarth PH, Bradding P, Montefort S, Peroni D, Djukanovic R, Carroll MP, et al. Mucosal  
384 inflammation and asthma. *American journal of respiratory and critical care medicine*. 1994;150(5 Pt 2):S18-  
385 22. Epub 1994/11/01. doi: 10.1164/ajrccm/150.5\_Pt\_2.S18. PubMed PMID: 7952584.
- 386 5. Zissler UM, Esser-von Bieren J, Jakwerth CA, Chaker AM, Schmidt-Weber CB. Current and future  
387 biomarkers in allergic asthma. *Allergy*. 2016;71(4):475-94. Epub 2015/12/27. doi: 10.1111/all.12828.  
388 PubMed PMID: 26706728.
- 389 6. Diamant Z, Gauvreau GM, Cockcroft DW, Boulet LP, Sterk PJ, de Jongh FH, et al. Inhaled allergen  
390 bronchoprovocation tests. *The Journal of allergy and clinical immunology*. 2013;132(5):1045-55.e6. Epub  
391 2013/10/15. doi: 10.1016/j.jaci.2013.08.023. PubMed PMID: 24119772.
- 392 7. Wohlsen A, Martin C, Vollmer E, Branscheid D, Magnussen H, Becker WM, et al. The early allergic  
393 response in small airways of human precision-cut lung slices. *The European respiratory journal*.  
394 2003;21(6):1024-32. Epub 2003/06/12. PubMed PMID: 12797499.
- 395 8. Fahy JV. Type 2 inflammation in asthma--present in most, absent in many. *Nature reviews*  
396 *Immunology*. 2015;15(1):57-65. Epub 2014/12/24. doi: 10.1038/nri3786. PubMed PMID: 25534623;  
397 PubMed Central PMCID: PMC4390063.
- 398 9. Schelegle ES, Gershwin LJ, Miller LA, Fanucchi MV, Van Winkle LS, Gerriets JP, et al. Allergic  
399 asthma induced in rhesus monkeys by house dust mite (*Dermatophagoides farinae*). *The American journal*  
400 *of pathology*. 2001;158(1):333-41. Epub 2001/01/06. doi: 10.1016/s0002-9440(10)63973-9. PubMed  
401 PMID: 11141508; PubMed Central PMCID: PMC1850255.

- 402 10. Van Scott MR, Hooker JL, Ehrmann D, Shibata Y, Kukoly C, Salleng K, et al. Dust mite-induced  
403 asthma in cynomolgus monkeys. *Journal of applied physiology* (Bethesda, Md : 1985). 2004;96(4):1433-  
404 44. Epub 2003/12/16. doi: 10.1152/jappphysiol.01128.2003. PubMed PMID: 14672959.
- 405 11. Iwashita K, Kawasaki H, Sawada M, In M, Mataka Y, Kuwabara T. Shortening of the Induction  
406 Period of Allergic Asthma in Cynomolgus Monkeys by *Ascaris suum* and House Dust Mite. *Journal of*  
407 *Pharmacological Sciences*. 2008;106(1):92-9. doi: 10.1254/jphs.FP0071523.
- 408 12. Miller LA, Plopper CG, Hyde DM, Gerriets JE, Pieczarka EM, Tyler NK, et al. Immune and airway  
409 effects of house dust mite aeroallergen exposures during postnatal development of the infant rhesus monkey.  
410 *Clinical and experimental allergy : journal of the British Society for Allergy and Clinical Immunology*.  
411 2003;33(12):1686-94. Epub 2003/12/06. PubMed PMID: 14656356.
- 412 13. Ayanoglu G, Desai B, Fick RB, Jr., Grein J, de Waal Malefyt R, Mattson J, et al. Modelling asthma  
413 in macaques: longitudinal changes in cellular and molecular markers. *The European respiratory journal*.  
414 2011;37(3):541-52. Epub 2010/07/24. doi: 10.1183/09031936.00047410. PubMed PMID: 20650997.
- 415 14. Van Scott MR, Reece SP, Olmstead S, Wardle R, Rosenbaum MD. Effects of acute psychosocial  
416 stress in a nonhuman primate model of allergic asthma. *Journal of the American Association for Laboratory*  
417 *Animal Science : JAALAS*. 2013;52(2):157-64. Epub 2013/04/09. PubMed PMID: 23562098; PubMed  
418 Central PMCID: PMC3624783.
- 419 15. Madwed JB, Jackson AC. Determination of airway and tissue resistances after antigen and  
420 methacholine in nonhuman primates. *Journal of applied physiology* (Bethesda, Md : 1985).  
421 1997;83(5):1690-6. Epub 1998/01/07. PubMed PMID: 9375340.
- 422 16. Seehase S, Schleputz M, Switalla S, Matz-Rensing K, Kaup FJ, Zoller M, et al. Bronchoconstriction  
423 in nonhuman primates: a species comparison. *Journal of applied physiology* (Bethesda, Md : 1985).  
424 2011;111(3):791-8. Epub 2011/06/28. doi: 10.1152/jappphysiol.00162.2011. PubMed PMID: 21700889.
- 425 17. Joad JP, Kott KS, Bric JM, Schelegle ES, Gershwin LJ, Plopper CG, et al. The effects of inhaled  
426 corticosteroids on intrinsic responsiveness and histology of airways from infant monkeys exposed to house  
427 dust mite allergen and ozone. *Toxicology and applied pharmacology*. 2008;226(2):153-60. Epub  
428 2007/11/10. doi: 10.1016/j.taap.2007.09.005. PubMed PMID: 17991502.
- 429 18. Curths C, Knauf S, Kaup F-J. Respiratory Animal Models in the Common Marmoset (*Callithrix*  
430 *jacchus*). *Veterinary Sciences*. 2014;1(1):63-76. doi: 10.3390/vetsci1010063.

- 431 19. Seehase S, Lauenstein HD, Schlumbohm C, Switalla S, Neuhaus V, Forster C, et al. LPS-induced  
432 lung inflammation in marmoset monkeys - an acute model for anti-inflammatory drug testing. *PloS one*.  
433 2012;7(8):e43709. doi: 10.1371/journal.pone.0043709. PubMed PMID: 22952743; PubMed Central  
434 PMCID: PMC3429492.
- 435 20. Curths C, Wichmann J, Dunker S, Windt H, Hoymann HG, Lauenstein HD, et al. Airway hyper-  
436 responsiveness in lipopolysaccharide-challenged common marmosets (*Callithrix jacchus*). *Clinical science*.  
437 2014;126(2):155-62. doi: 10.1042/CS20130101. PubMed PMID: 23879175; PubMed Central PMCID:  
438 PMC3793853.
- 439 21. Rondeau JM, Ramage P, Zurini M, Gram H. The molecular mode of action and species specificity  
440 of canakinumab, a human monoclonal antibody neutralizing IL-1beta. *mAbs*. 2015;7(6):1151-60. Epub  
441 2015/08/19. doi: 10.1080/19420862.2015.1081323. PubMed PMID: 26284424; PubMed Central PMCID:  
442 PMCPMC4966334.
- 443 22. European Medicines Agency (EMA). CHMP assessment report for ILARIS. International  
444 Nonproprietary Name: canakinumab. Procedure No. EMEA/H/C/001109 2009 EMEA/503722/2009.  
445 Available from: [http://www.ema.europa.eu/docs/en\\_GB/document\\_library/EPAR\\_-\\_](http://www.ema.europa.eu/docs/en_GB/document_library/EPAR_-_Public_assessment_report/human/001109/WC500031679.pdf)  
446 [Public\\_assessment\\_report/human/001109/WC500031679.pdf](http://www.ema.europa.eu/docs/en_GB/document_library/EPAR_-_Public_assessment_report/human/001109/WC500031679.pdf).
- 447 23. Fuchs B, Braun A. Improved mouse models of allergy and allergic asthma--chances beyond  
448 ovalbumin. *Current drug targets*. 2008;9(6):495-502. Epub 2008/06/10. PubMed PMID: 18537588.
- 449 24. Nials AT, Uddin S. Mouse models of allergic asthma: acute and chronic allergen challenge. *Disease*  
450 *models & mechanisms*. 2008;1(4-5):213-20. Epub 2008/12/19. doi: 10.1242/dmm.000323. PubMed PMID:  
451 19093027; PubMed Central PMCID: PMCPMC2590830.
- 452 25. Yasue M, Nakamura S, Yokota T, Okudaira H, Okumura Y. Experimental monkey model sensitized  
453 with mite antigen. *International archives of allergy and immunology*. 1998;115(4):303-11. Epub  
454 1998/05/05. PubMed PMID: 9566353.
- 455 26. Lommatzsch M, Julius P, Kuepper M, Garn H, Bratke K, Irmscher S, et al. The course of allergen-  
456 induced leukocyte infiltration in human and experimental asthma. *The Journal of allergy and clinical*  
457 *immunology*. 2006;118(1):91-7. Epub 2006/07/04. doi: 10.1016/j.jaci.2006.02.034. PubMed PMID:  
458 16815143.

- 459 27. Ray A, Kolls JK. Neutrophilic Inflammation in Asthma and Association with Disease Severity.  
460 Trends Immunol. 2017;38(12):942-54. Epub 2017/08/09. doi: 10.1016/j.it.2017.07.003. PubMed PMID:  
461 28784414; PubMed Central PMCID: PMC5711587.
- 462 28. Young SS, Ritacco G, Skeans S, Chapman RW. Eotaxin and nitric oxide production as markers of  
463 inflammation in allergic cynomolgus monkeys. International archives of allergy and immunology.  
464 1999;120(3):209-17. Epub 1999/12/11. doi: 24269. PubMed PMID: 10592466.
- 465 29. Schelegle ES, Miller LA, Gershwin LJ, Fanucchi MV, Van Winkle LS, Gerriets JE, et al. Repeated  
466 episodes of ozone inhalation amplifies the effects of allergen sensitization and inhalation on airway immune  
467 and structural development in Rhesus monkeys. Toxicology and applied pharmacology. 2003;191(1):74-  
468 85. Epub 2003/08/14. PubMed PMID: 12915105.
- 469 30. Wang L, Jenkins TJ, Dai M, Yin W, Pulido JC, Lamantia-Martin E, et al. Antagonism of chemokine  
470 receptor CCR8 is ineffective in a primate model of asthma. Thorax. 2013;68(6):506-12. Epub 2013/03/05.  
471 doi: 10.1136/thoraxjnl-2012-203012. PubMed PMID: 23457038.
- 472 31. Laan MP, Baert MR, Vredendaal AE, Savelkoul HF. Differential mRNA expression and production  
473 of interleukin-4 and interferon-gamma in stimulated peripheral blood mononuclear cells of house-dust mite-  
474 allergic patients. European cytokine network. 1998;9(1):75-84. Epub 1998/06/05. PubMed PMID: 9613681.
- 475 32. Jenmalm MC, Bjorksten B. Development of immunoglobulin G subclass antibodies to ovalbumin,  
476 birch and cat during the first eight years of life in atopic and non-atopic children. Pediatric allergy and  
477 immunology : official publication of the European Society of Pediatric Allergy and Immunology.  
478 1999;10(2):112-21. Epub 1999/09/09. PubMed PMID: 10478613.
- 479 33. Miranda DO, Silva DA, Fernandes JF, Queiros MG, Chiba HF, Ynoue LH, et al. Serum and salivary  
480 IgE, IgA, and IgG4 antibodies to Dermatophagoides pteronyssinus and its major allergens, Der p1 and Der  
481 p2, in allergic and nonallergic children. Clinical & developmental immunology. 2011;2011:302739. Epub  
482 2011/10/19. doi: 10.1155/2011/302739. PubMed PMID: 22007250; PubMed Central PMCID:  
483 PMC3189464.
- 484 34. Shimoda T, Obase Y, Kishikawa R, Iwanaga T. Serum high-sensitivity C-reactive protein can be an  
485 airway inflammation predictor in bronchial asthma. Allergy and asthma proceedings. 2015;36(2):e23-8.  
486 Epub 2015/02/26. doi: 10.2500/aap.2015.36.3816. PubMed PMID: 25715235.

- 487 35. Wang X, Reece S, Olmstead S, Wardle RL, Van Scott MR. Nocturnal thoracoabdominal asynchrony  
488 in house dust mite-sensitive nonhuman primates. *Journal of asthma and allergy*. 2010;3:75-86. Epub  
489 2010/01/01. PubMed PMID: 21437042; PubMed Central PMCID: PMCPMC3047915.
- 490 36. Hovenberg HW, Davies JR, Carlstedt I. Different mucins are produced by the surface epithelium  
491 and the submucosa in human trachea: identification of MUC5AC as a major mucin from the goblet cells.  
492 *The Biochemical journal*. 1996;318 ( Pt 1):319-24. Epub 1996/08/15. PubMed PMID: 8761488; PubMed  
493 Central PMCID: PMCPMC1217624.
- 494 37. Seidel V. Morphological investigations on the lung of common marmosets (*Callithrix jacchus*) (in  
495 German). [Doctoral Thesis]: Doctoral Thesis, School of Veterinary Medicine, Hannover, Germany; 2012.
- 496 38. Roth FD, Quintar AA, Uribe Echevarria EM, Torres AI, Aoki A, Maldonado CA. Budesonide  
497 effects on Clara cell under normal and allergic inflammatory condition. *Histochem Cell Biol*.  
498 2007;127(1):55-68. Epub 2006/07/22. doi: 10.1007/s00418-006-0220-3. PubMed PMID: 16858555.
- 499 39. Shijubo N, Itoh Y, Yamaguchi T, Imada A, Hirasawa M, Yamada T, et al. Clara cell protein-positive  
500 epithelial cells are reduced in small airways of asthmatics. *American journal of respiratory and critical care*  
501 *medicine*. 1999;160(3):930-3. Epub 1999/09/03. doi: 10.1164/ajrccm.160.3.9803113. PubMed PMID:  
502 10471621.  
503

504 FIGURES

505 **Figure 1: Bronchoalveolar lavage cell counts and cytokines before and after the HDM challenge**

506 **phase.** Bronchoalveolar lavage was performed before and after the HDM challenge phase in negative  
507 control and HDM-sensitized animals. Total cells and differentiated cell counts per ml bronchoalveolar  
508 lavage fluid (BALF) are depicted in (A). Eosinophils and mast cells were significantly increased in  
509 sensitized compared to negative control animals, whereas neutrophils were elevated in negative control  
510 animals. Cytokine analysis in BALF revealed an increase of IL-13 only in sensitized animals (B) and of  
511 IFN- $\gamma$  in both groups (C).

512 Mean+SEM; n=8 negative control, n=17 sensitized; BALF=bronchoalveolar lavage fluid; unpaired t test

513 (A). Box plot with median $\pm$ SEM; Wilcoxon matched-pairs signed rank test (B, C).

514

515 **Figure 2: BALF cell count differences after therapeutic intervention.** Bronchoalveolar lavage was  
516 performed before and after treatment and differences in cells/ml BALF were evaluated between both time  
517 points. After the treatment phase, total cell count was increased in BALF of sham-treated animals (A).  
518 Eosinophils (B), mast cells (D), and lymphocytes (E) rose to the greatest extent in sham-treated animals and  
519 were reduced by budesonide treatment. Neutrophils (C) increased in budesonide-treated animals compared  
520 to negative control animals. Mean±SEM; n=8/8/9; BALF=bronchoalveolar lavage fluid; unpaired t-test.  
521



523 **Figure 3: Development of anti-HDM IgG serum antibodies in marmosets.** Serum IgG directed against  
524 the allergen was detected after sensitization. The HDM-specific IgG increased over time and reached a  
525 maximum after the challenge phase. Box plot with median; n=15-16; AU=arbitrary units; Wilcoxon  
526 matched-pairs signed rank test.

527  
528 **Figure 4: HDM-restimulated PBMC of sensitized marmosets release IL-13 and IFN- $\gamma$  after allergen**  
529 **sensitization.** PBMC were isolated after sensitization and stimulated with HDM for 96 h. PBMC from  
530 sensitized animals (grey bars) secreted elevated IL-13 (A) and IFN- $\gamma$  (B) compared to unstimulated PBMC.  
531 Dexamethasone reduced allergen-related cytokine release. Allergen-dependent cytokine release from  
532 PBMC of negative animals was not elevated (white bars). Box plot with median; n varies for different  
533 stimulations; HDM=house dust mite; dexamethasone; Mann-Whitney-Wilcoxon test.

534  
535 **Figure 5: *Ex vivo* bronchoconstriction towards allergen in precision-cut lung slices.** After the  
536 therapeutic intervention, PCLS were generated and stimulated with HDM. Immediately after allergen  
537 stimulation, airway areas were monitored by video microscopy to evaluate maximum contraction. Only  
538 PCLS from sham-treated animals showed a marked HDM-dependent decrease in airway area. Mean+SEM;  
539 n=5; PCLS= precision-cut lung slices; paired t-test.

540

## 541 SUPPLEMENTARY METHODS

### 542 *Skin prick test*

543 Animals were anesthetized before skin prick testing. The abdomen and the chest were clipped and  
544 disinfected, and animals were put in a dorsal recumbence. Solutions including histamine as a positive control  
545 (ALK-Abelló Arzneimittel GmbH) and HDM extract to test sensitization were dropped onto the skin,  
546 followed by a skin prick. Any developing wheal was measured in size 15 minutes after pricking the skin.

547

### 548 *Cytospot processing*

549 After centrifugation, slides were air-dried and stained within the next days. Differential cell counts were  
550 analyzed after May-Gruenwald Giemsa stain. Therefore, slides were stained for 5 min with May-  
551 Gruenwald's eosin-methylene blue solution, rinsed with ultrapure water (Co-med Online-Shop, Heusweiler,  
552 Germany) and stained for 15 min with 1:20 diluted Giemsa's azur-eosin-methylene blue solution (Merck  
553 KGaA, Darmstadt, Germany). Slides were rinsed, air-dried and mounted using Eukitt® quick-hardening  
554 mounting medium (Sigma-Aldrich®, St. Louis, USA). Mast cells in BALF were detected  
555 immunohistochemically employing a 1:200 diluted monoclonal anti-human mast cell tryptase antibody  
556 (Dako, Hamburg, Germany). Differential cell counts were conducted on a percentage basis and cell counts  
557 per ml BALF were calculated comprising the total cell number.

558

### 559 *Histopathology, and immunohistochemistry*

560 After floating fixation of the right caudal lung lobe for at least 24 h, the right caudal lung lobe was embedded  
561 in paraffin. Sections of 3-5 µm thickness were prepared from two defined localizations per animal.  
562 Specimens were stained with hematoxylin and eosin (H&E) and evaluated for the presence of inflammatory  
563 changes. Goblet cell detection was performed by immunohistochemistry (IHC) using an anti-mucin 5AC-  
564 antibody (MUC5AC, clone 45M1, Novus Biologicals; dilution 1:50). Mucin 5AC is a marker for goblet  
565 cells in human airways [36] and is also expressed in marmoset airway epithelium [37]. Also, an anti-CCSP-  
566 antibody (Clara Cell Protein Human Rabbit Polyclonal Antibody, Biovendor; dilution 1:2000) was used for

567 evaluation of changes in airway epithelial expression of CCSP in response to allergen challenge and  
568 budesonide treatment, respectively, as previously described for humans and mice [38, 39]. IHC was  
569 performed with an automated immunostaining system (Discovery XT, Roche Diagnostics GmbH) using the  
570 SABC (Streptavidin-Biotin-Complex) method and DAB (diaminobenzidine tetrahydrochloride) for signal  
571 detection (DAB Map Kit, Roche Diagnostics GmbH).

572

573

574 SUPPLEMENTARY TABLES & FIGURES

575 **Table S1: Marmoset *in vivo* lung function data for HDM and MCh provocations.** *In vivo* lung function  
 576 was evaluated at baseline (day -1) and post-challenge in negative control and sensitized animals.  
 577 Provocative dose (PD) values of MCh that resulted in a 150% increase in  $R_L$  or a 50% decrease in  $C_{dyn}$  were  
 578 assessed. At the end of the challenge phase, lung function was additionally analyzed after HDM provocation.  
 579 Delta lung resistance ( $R_L$ ) and dynamic compliance ( $C_{dyn}$ ) percentages represent the maximum increases  
 580 and decreases, respectively.  
 581 Medians; n=5-9 for negative control, n=11-18 for sensitized; MCh=methacholine.

|                             | baseline                                  | post-challenge                            |                         |
|-----------------------------|-------------------------------------------|-------------------------------------------|-------------------------|
| <b><math>R_L</math></b>     | PD <sub>150</sub> [ $\mu$ g MCh]          | PD <sub>150</sub> [ $\mu$ g MCh]          | delta $R_L$ HDM [%]     |
| negative control            | 0.72                                      | 0.41                                      | 70.7                    |
| sensitized                  | 0.73                                      | 0.49                                      | 24.9                    |
| <b><math>C_{dyn}</math></b> | PD <sub>50</sub> $C_{dyn}$ [ $\mu$ g MCh] | PD <sub>50</sub> $C_{dyn}$ [ $\mu$ g MCh] | delta $C_{dyn}$ HDM [%] |
| negative control            | 0.37                                      | 0.34                                      | -33.1                   |
| sensitized                  | 0.46                                      | 0.47                                      | -30.7                   |

582  
 583  
 584 **Table S2: Skin prick tests in marmosets.** Skin prick tests were performed at baseline, post-sensitization,  
 585 and post-challenge. All animals were tested before and after sensitization, whereas only two-thirds of the  
 586 animals were tested post-challenge. Wheal development towards HDM extract (Greer, ALK) in respect of  
 587 all valid tests are depicted. Validity was determined depending on results of control substances. Numbers  
 588 indicate positive single animals of all tested animals.

| animal group     | baseline | post-sensitization | post-challenge |
|------------------|----------|--------------------|----------------|
| negative control | 0/9      | 0/8                | 0/5            |
| sensitized       | 1/18     | 7/17               | 4/9            |

589  
 590

591 **Figure S1: Cytokine release of restimulated PBMC after challenge and treatment.** Cytokine release of  
 592 HDM stimulated PBMC is depicted after challenge (A, B), and after treatment (C, D). IL-13 (A, C) and  
 593 IFN- $\gamma$  (B, D) were detected by ELISA after 96 h. Additional incubation with dexamethasone reduced the  
 594 cytokine release independently of group membership. Box plot with median; n varies for different  
 595 stimulations; HDM=house dust mite; dexa=dexamethasone; Mann-Whitney-Wilcoxon test.

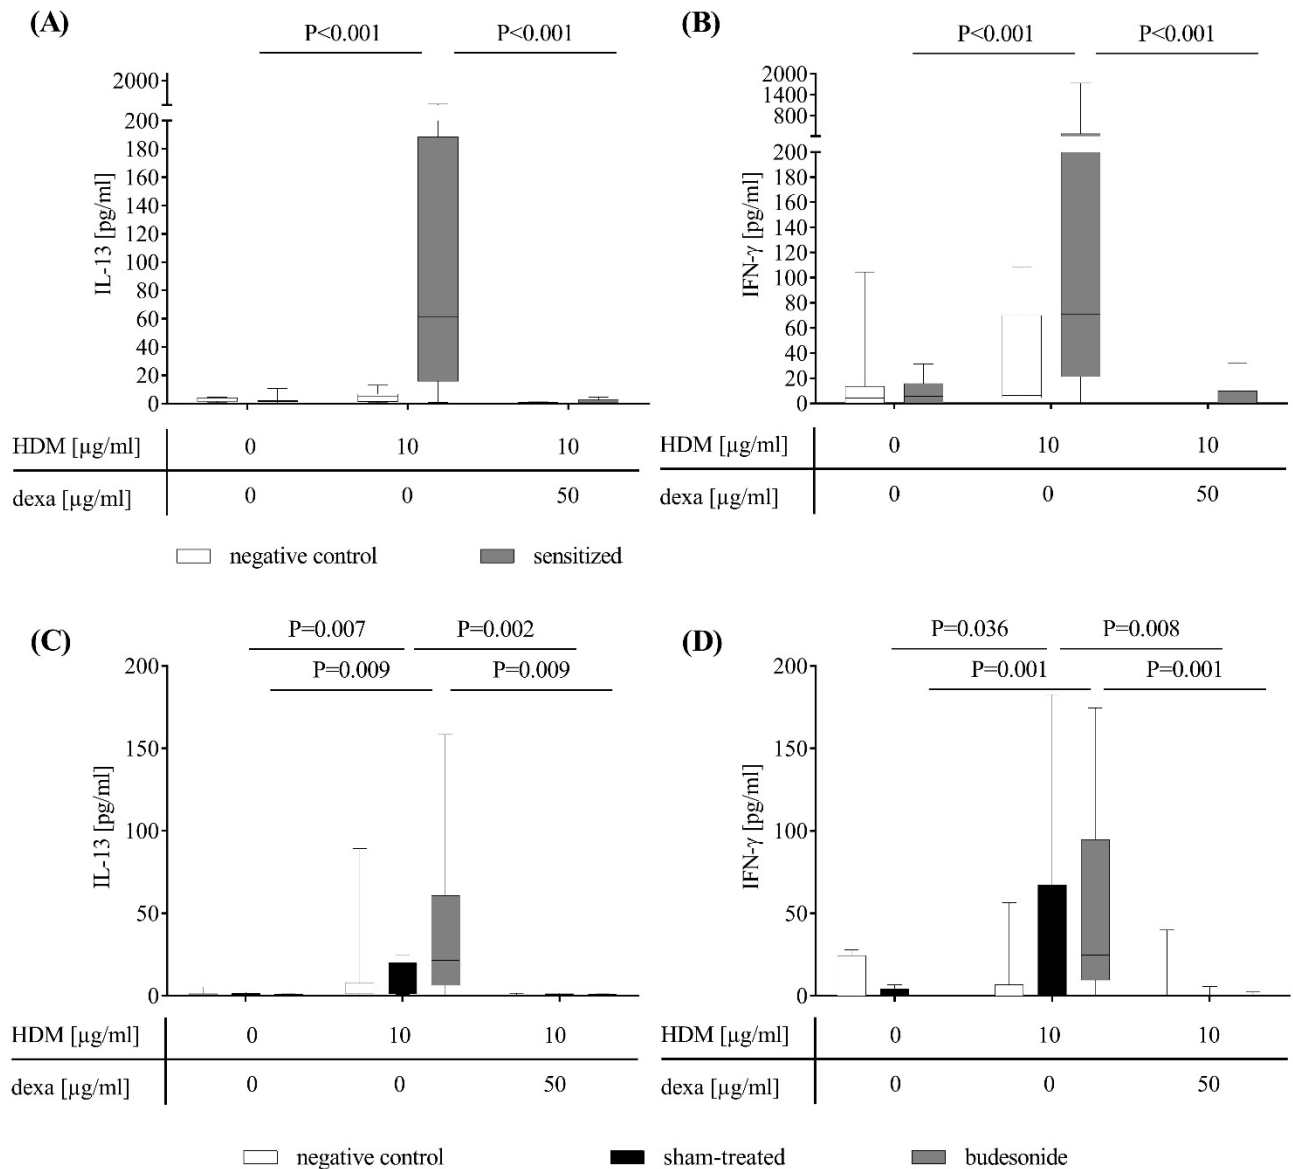

596  
 597  
 598

599 **Figure S2: Correlation analyses for eosinophils and two other immunity-related readouts.** Correlations  
600 were calculated after challenge (A) and after the therapeutic intervention (B). Eosinophils per ml BALF and  
601 HDM-specific serum IgG correlated for sensitized animals (A, n=17). After the therapeutic intervention,  
602 eosinophils per ml BALF correlated with HDM-induced PCLS-bronchoconstriction (B, n=25/15).  
603 Single values and linear regression line with corresponding Pearson correlation coefficients ( $r$ ) and P values  
604 are indicated. BALF=bronchoalveolar lavage fluid; HDM=house dust mite; AU=arbitrary units; PCLS=  
605 precision-cut lung slices.

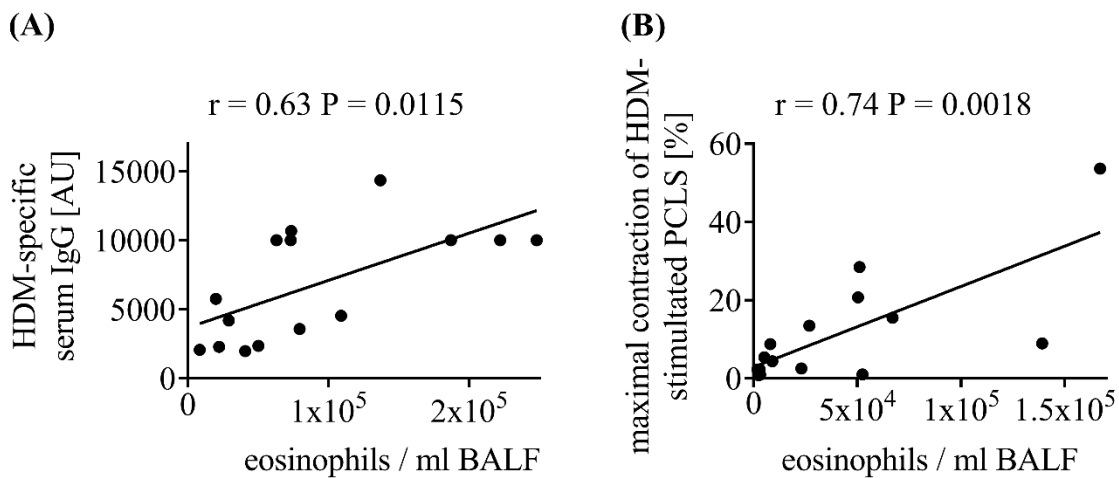

606

607 **Fig. S3: Systemic inflammatory parameters.** (A) Hematological analysis of EDTA-blood reveals an  
608 increase of white blood cells only in sensitized animals (grey) after challenge compared to pre-challenge  
609 values. Mean+SEM; n=8 negative control, n=10/16 sensitized; paired t-test) (B) C-reactive protein in serum  
610 before and after HDM challenge. After the allergen challenge phase, CRP concentrations in serum were not  
611 altered in negative control animals compared to baseline. Respective levels for sensitized animals increased.  
612 Mean+SEM; n=8 negative control, n=18 sensitized; paired t-test.

613

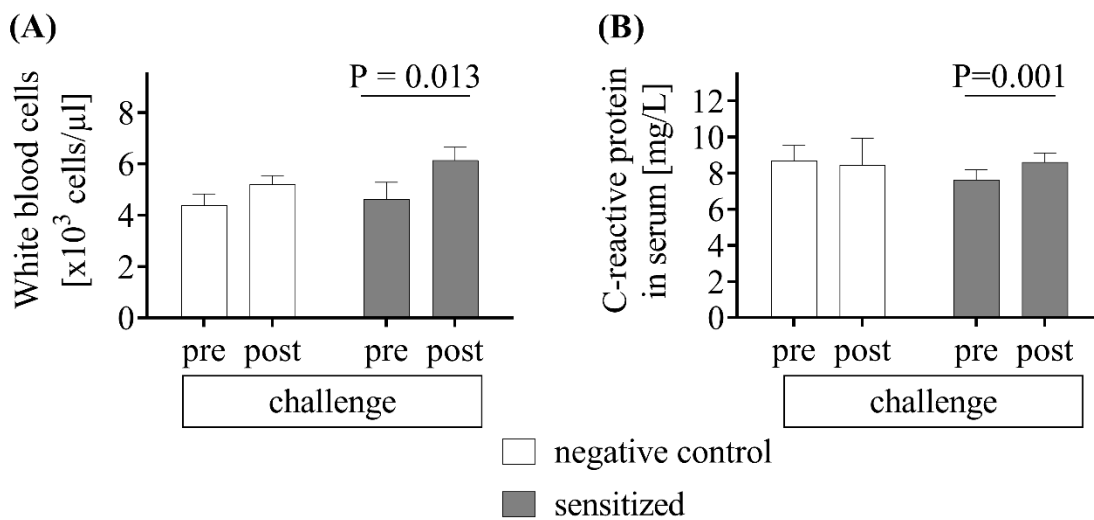

614

**(A)**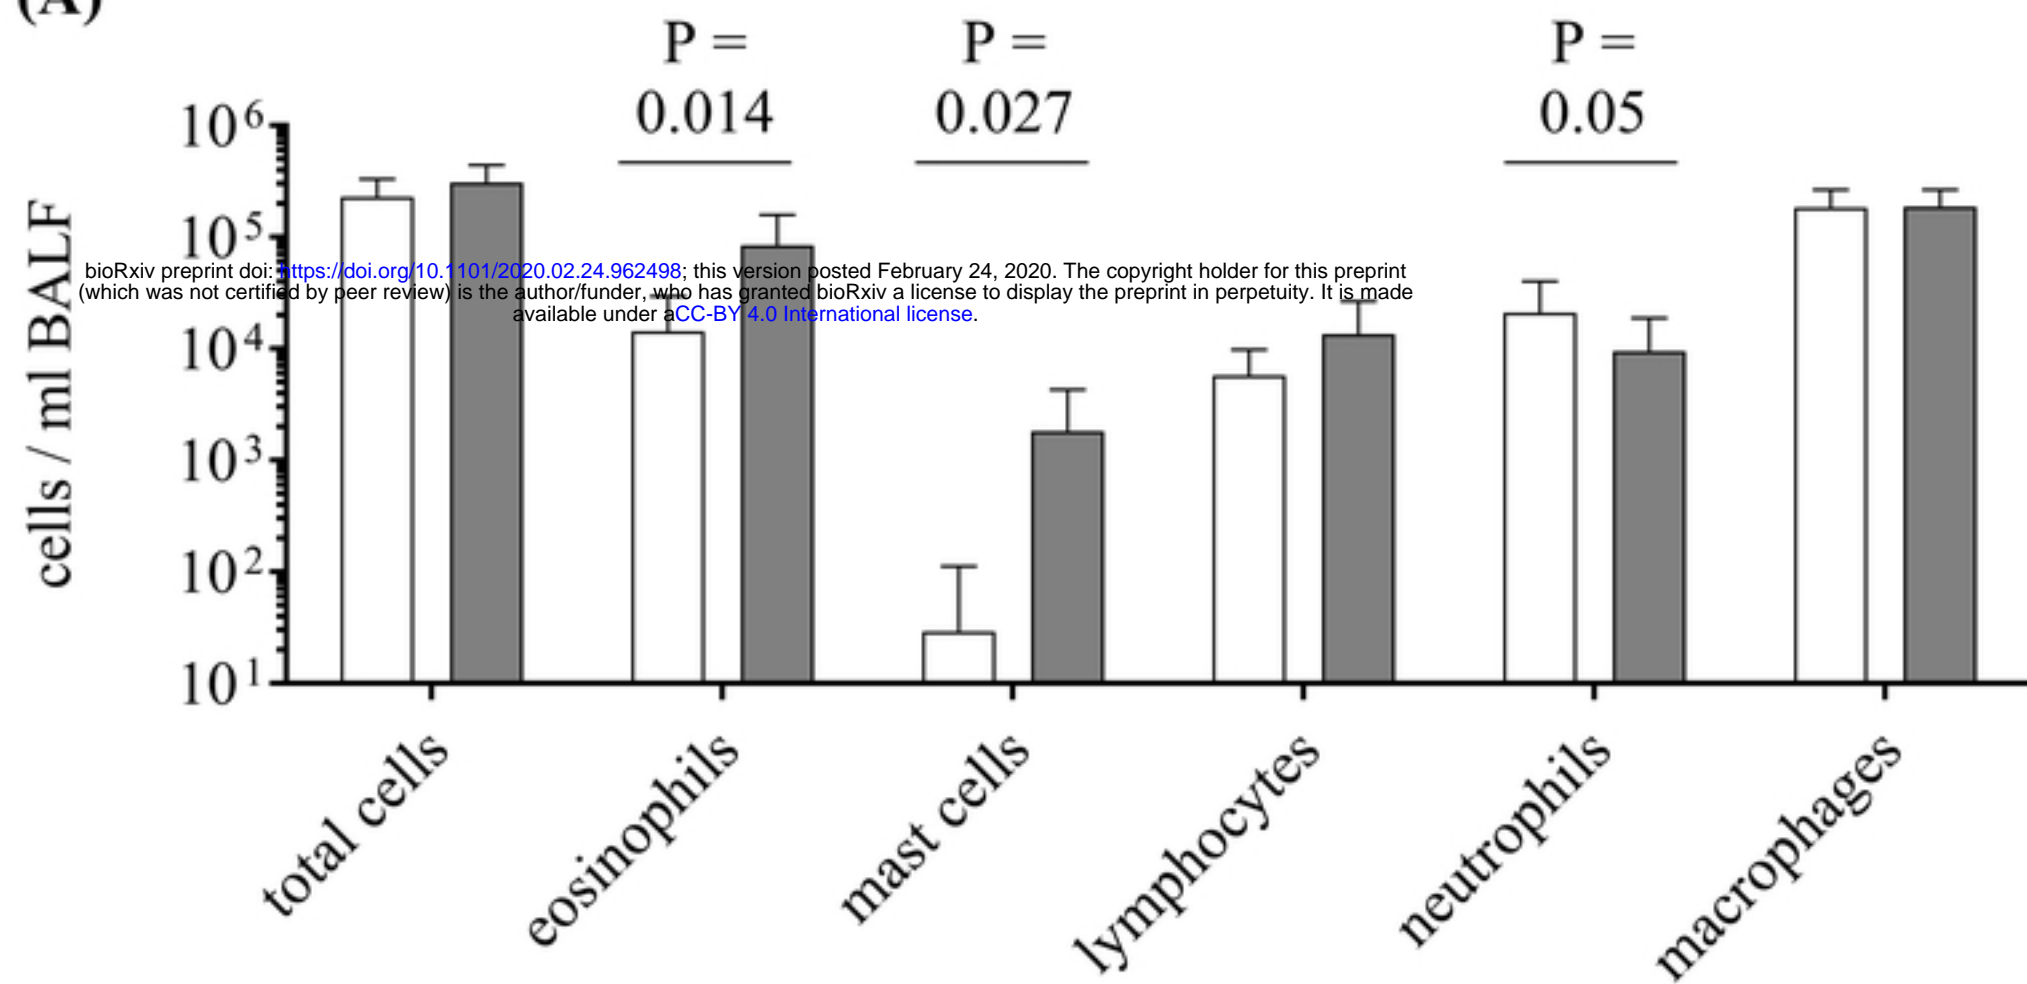**(B)**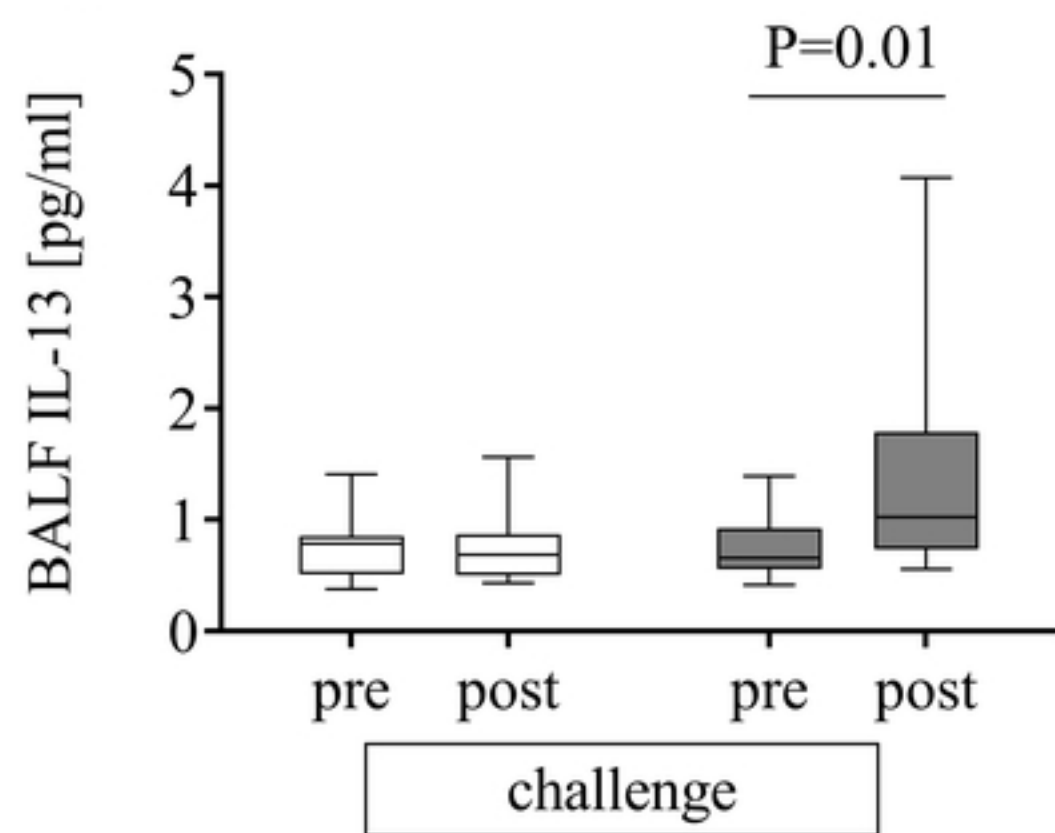**(C)**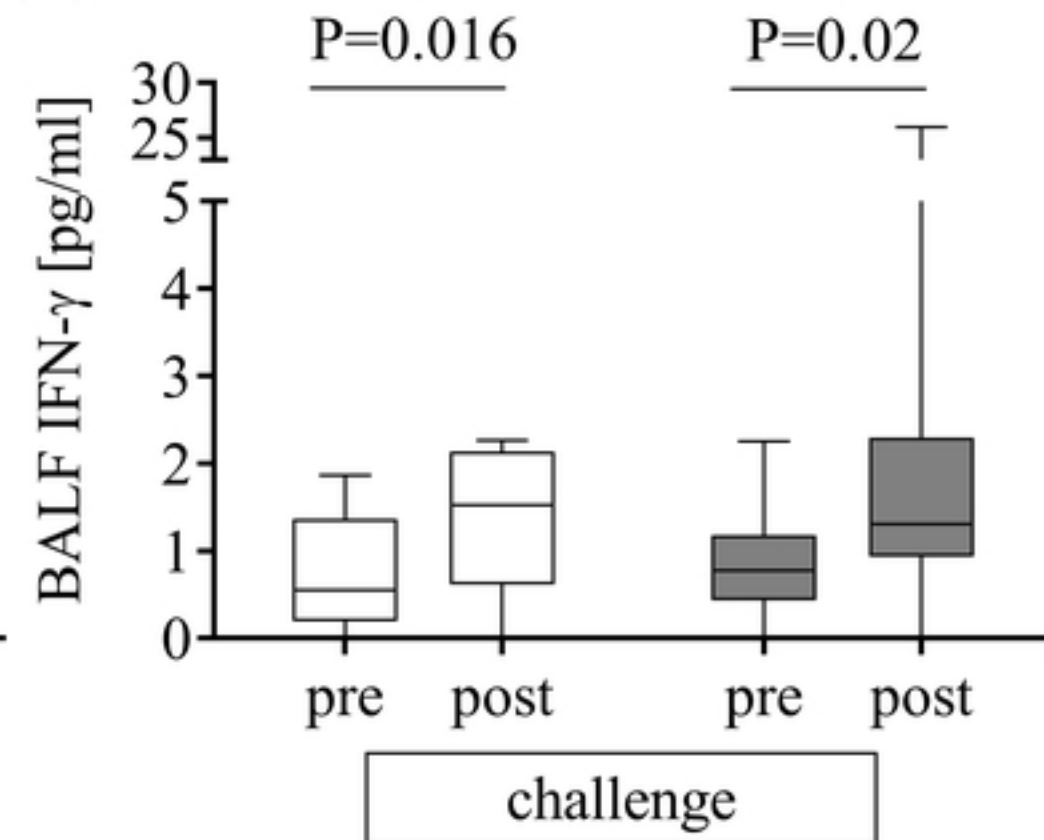

□ negative control

■ sensitized



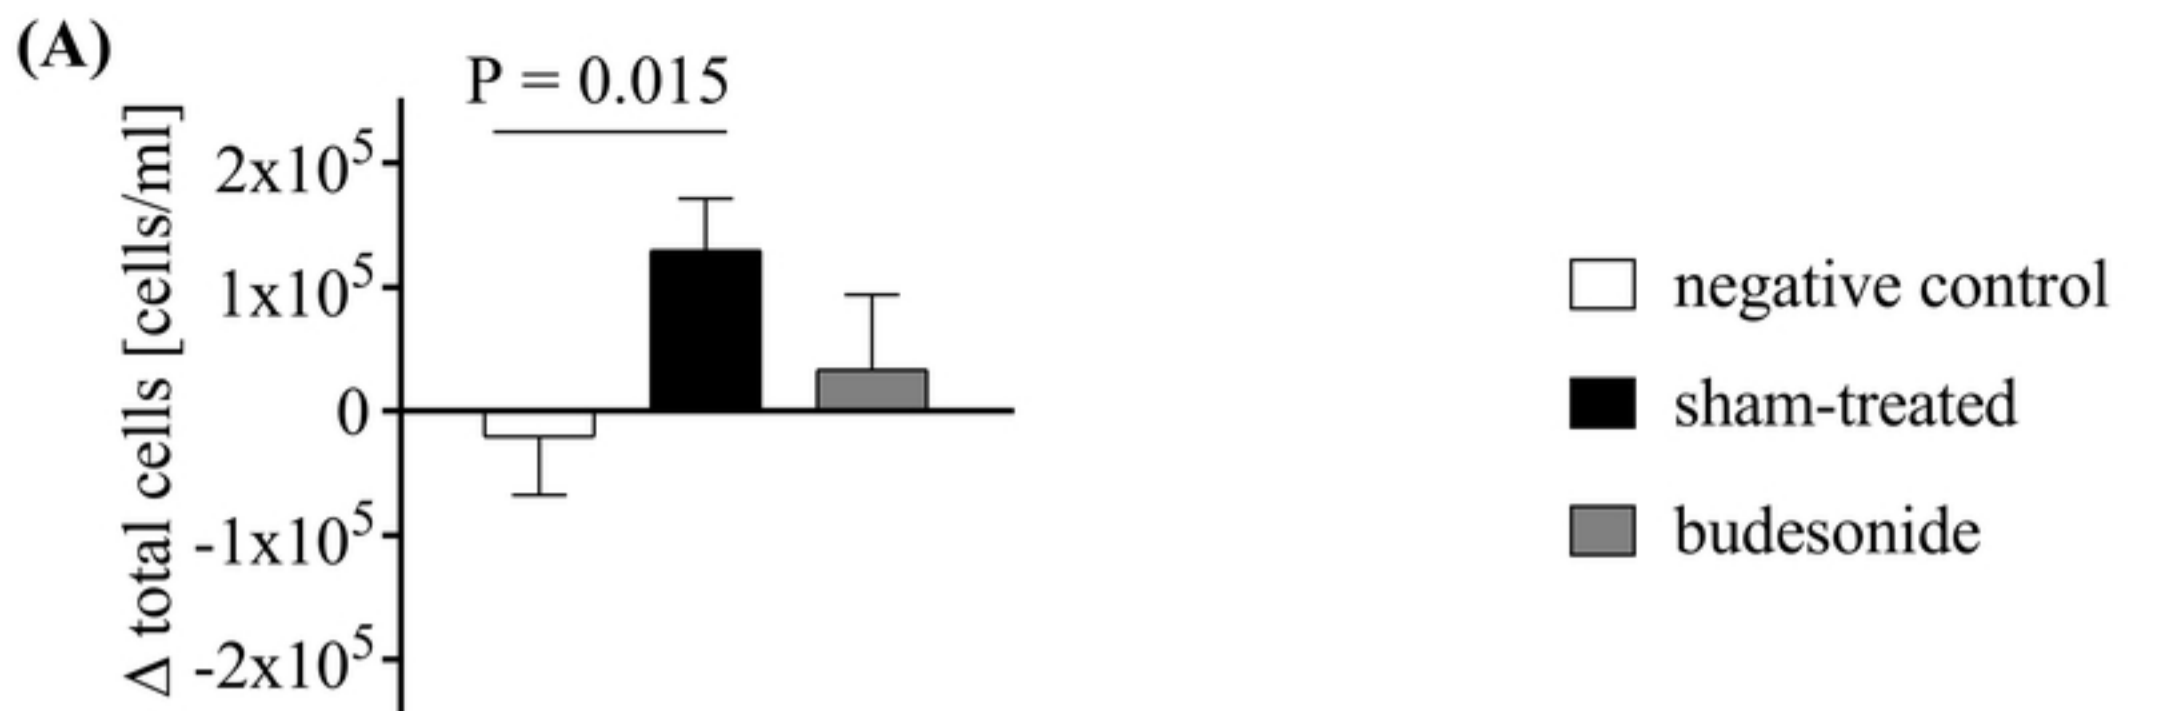

bioRxiv preprint doi: <https://doi.org/10.1101/2020.02.24.962498>; this version posted February 24, 2020. The copyright holder for this preprint (which was not certified by peer review) is the author/funder, who has granted bioRxiv a license to display the preprint in perpetuity. It is made available under aCC-BY 4.0 International license.

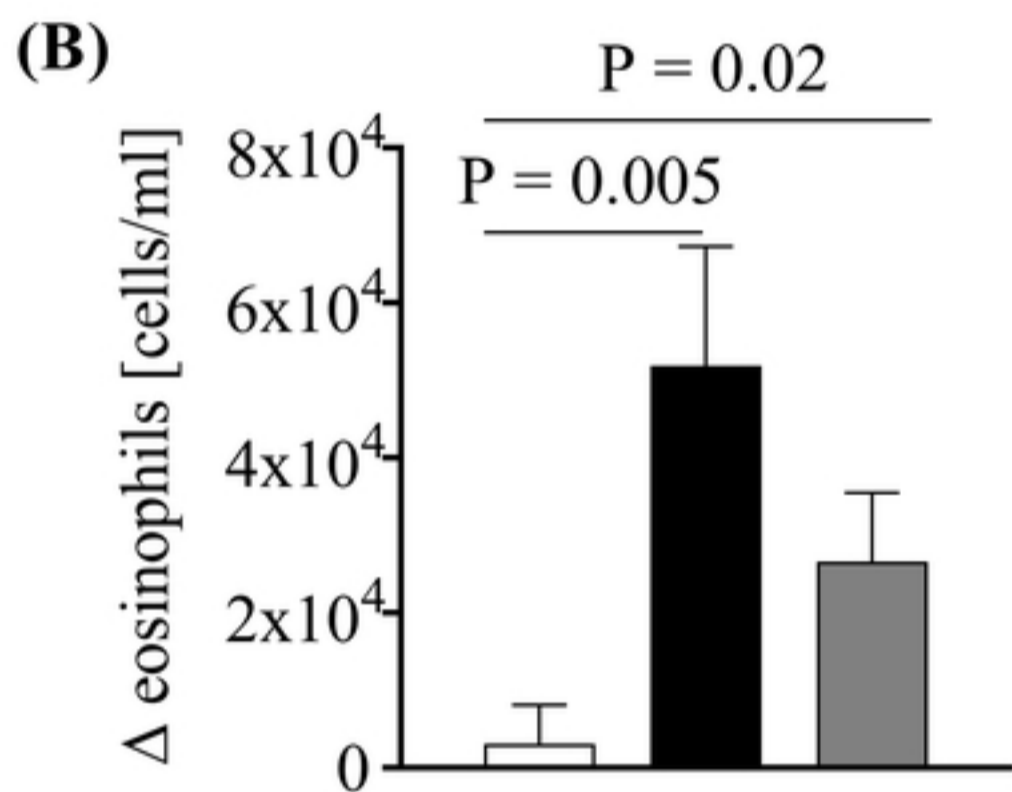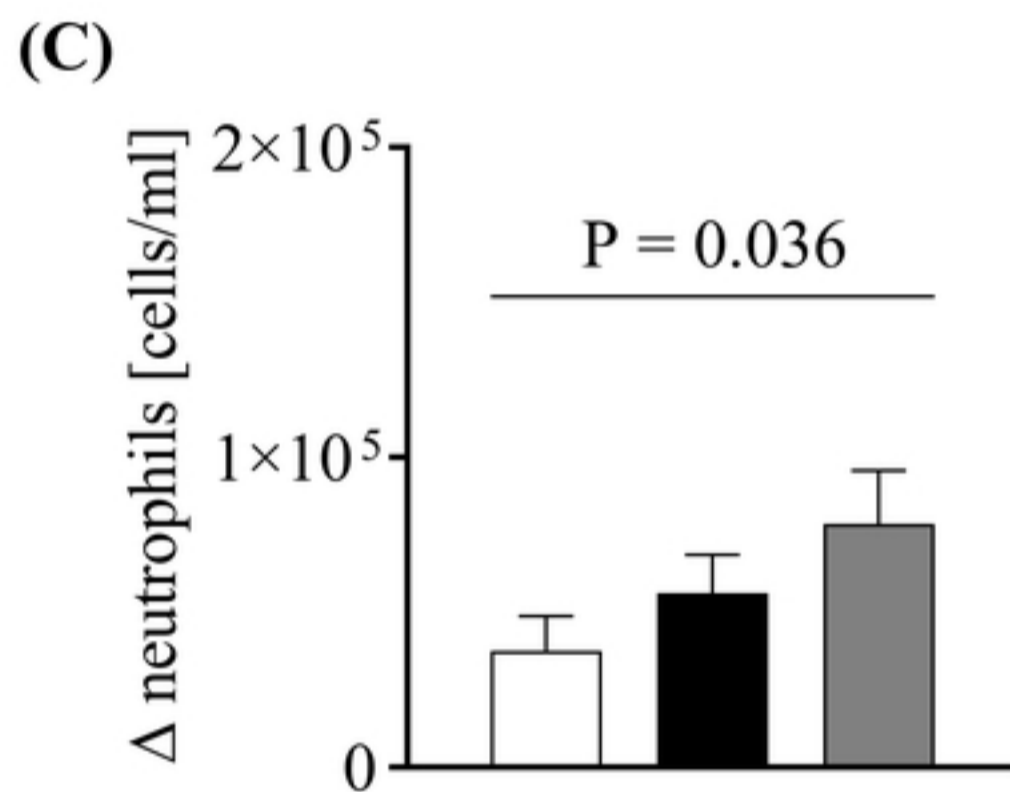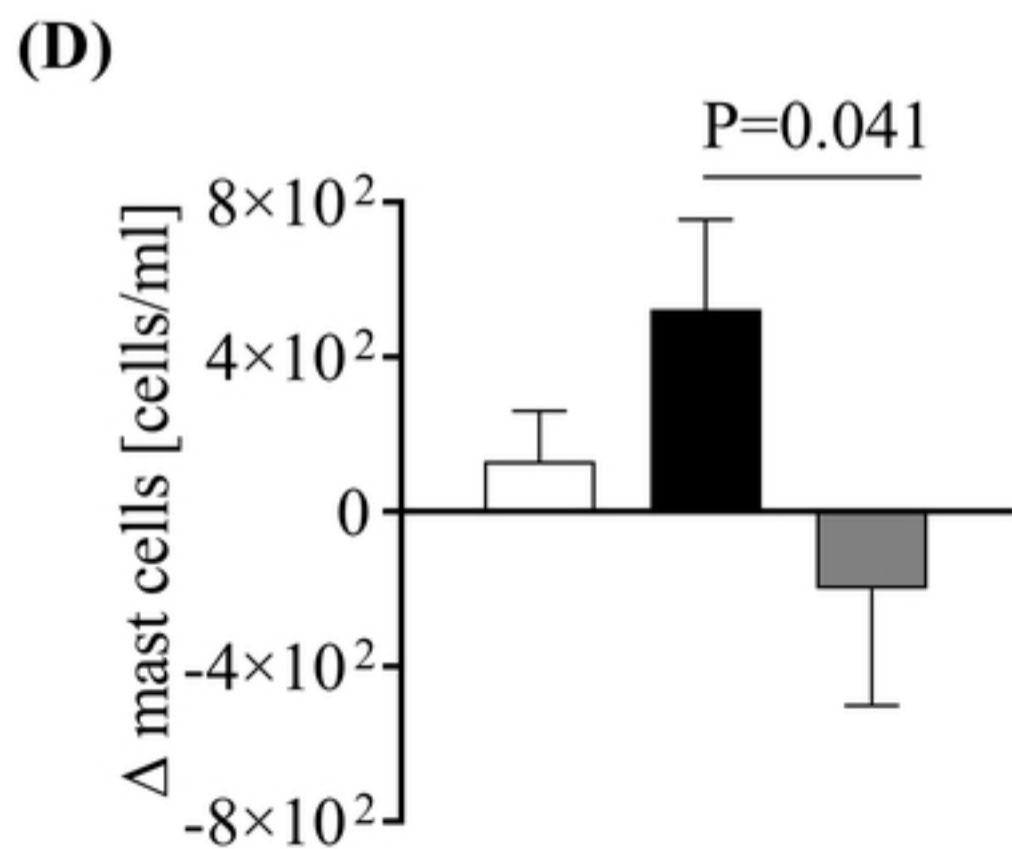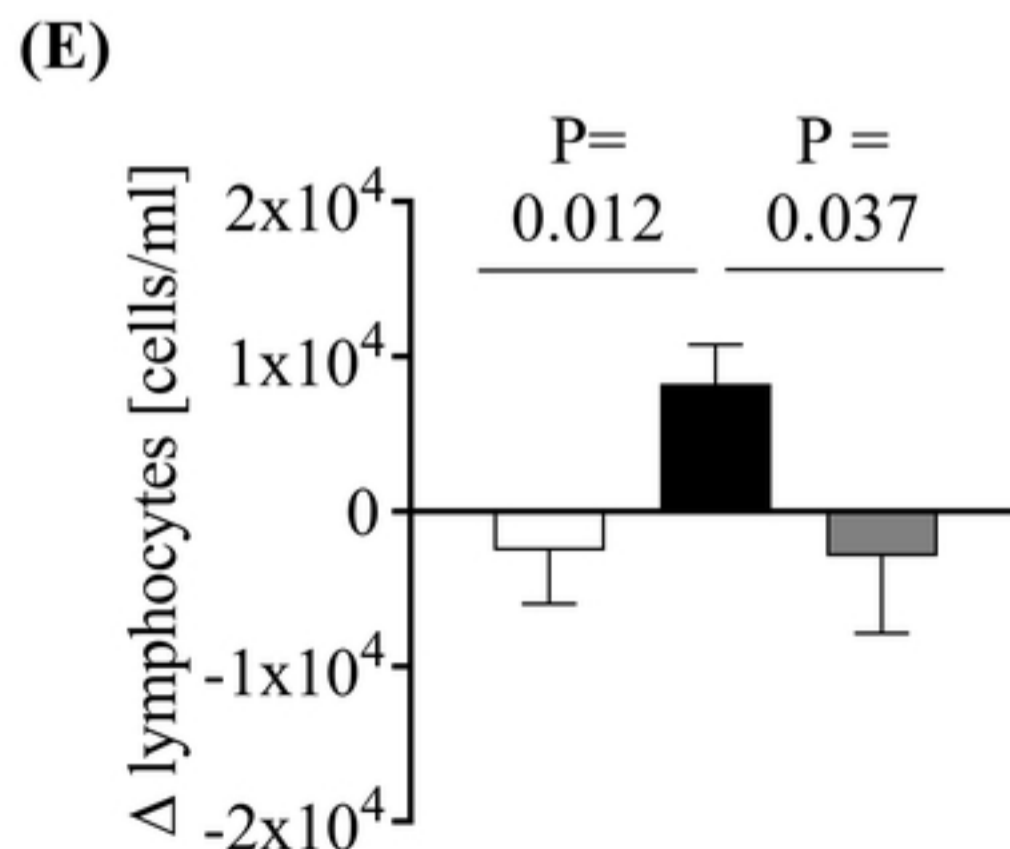

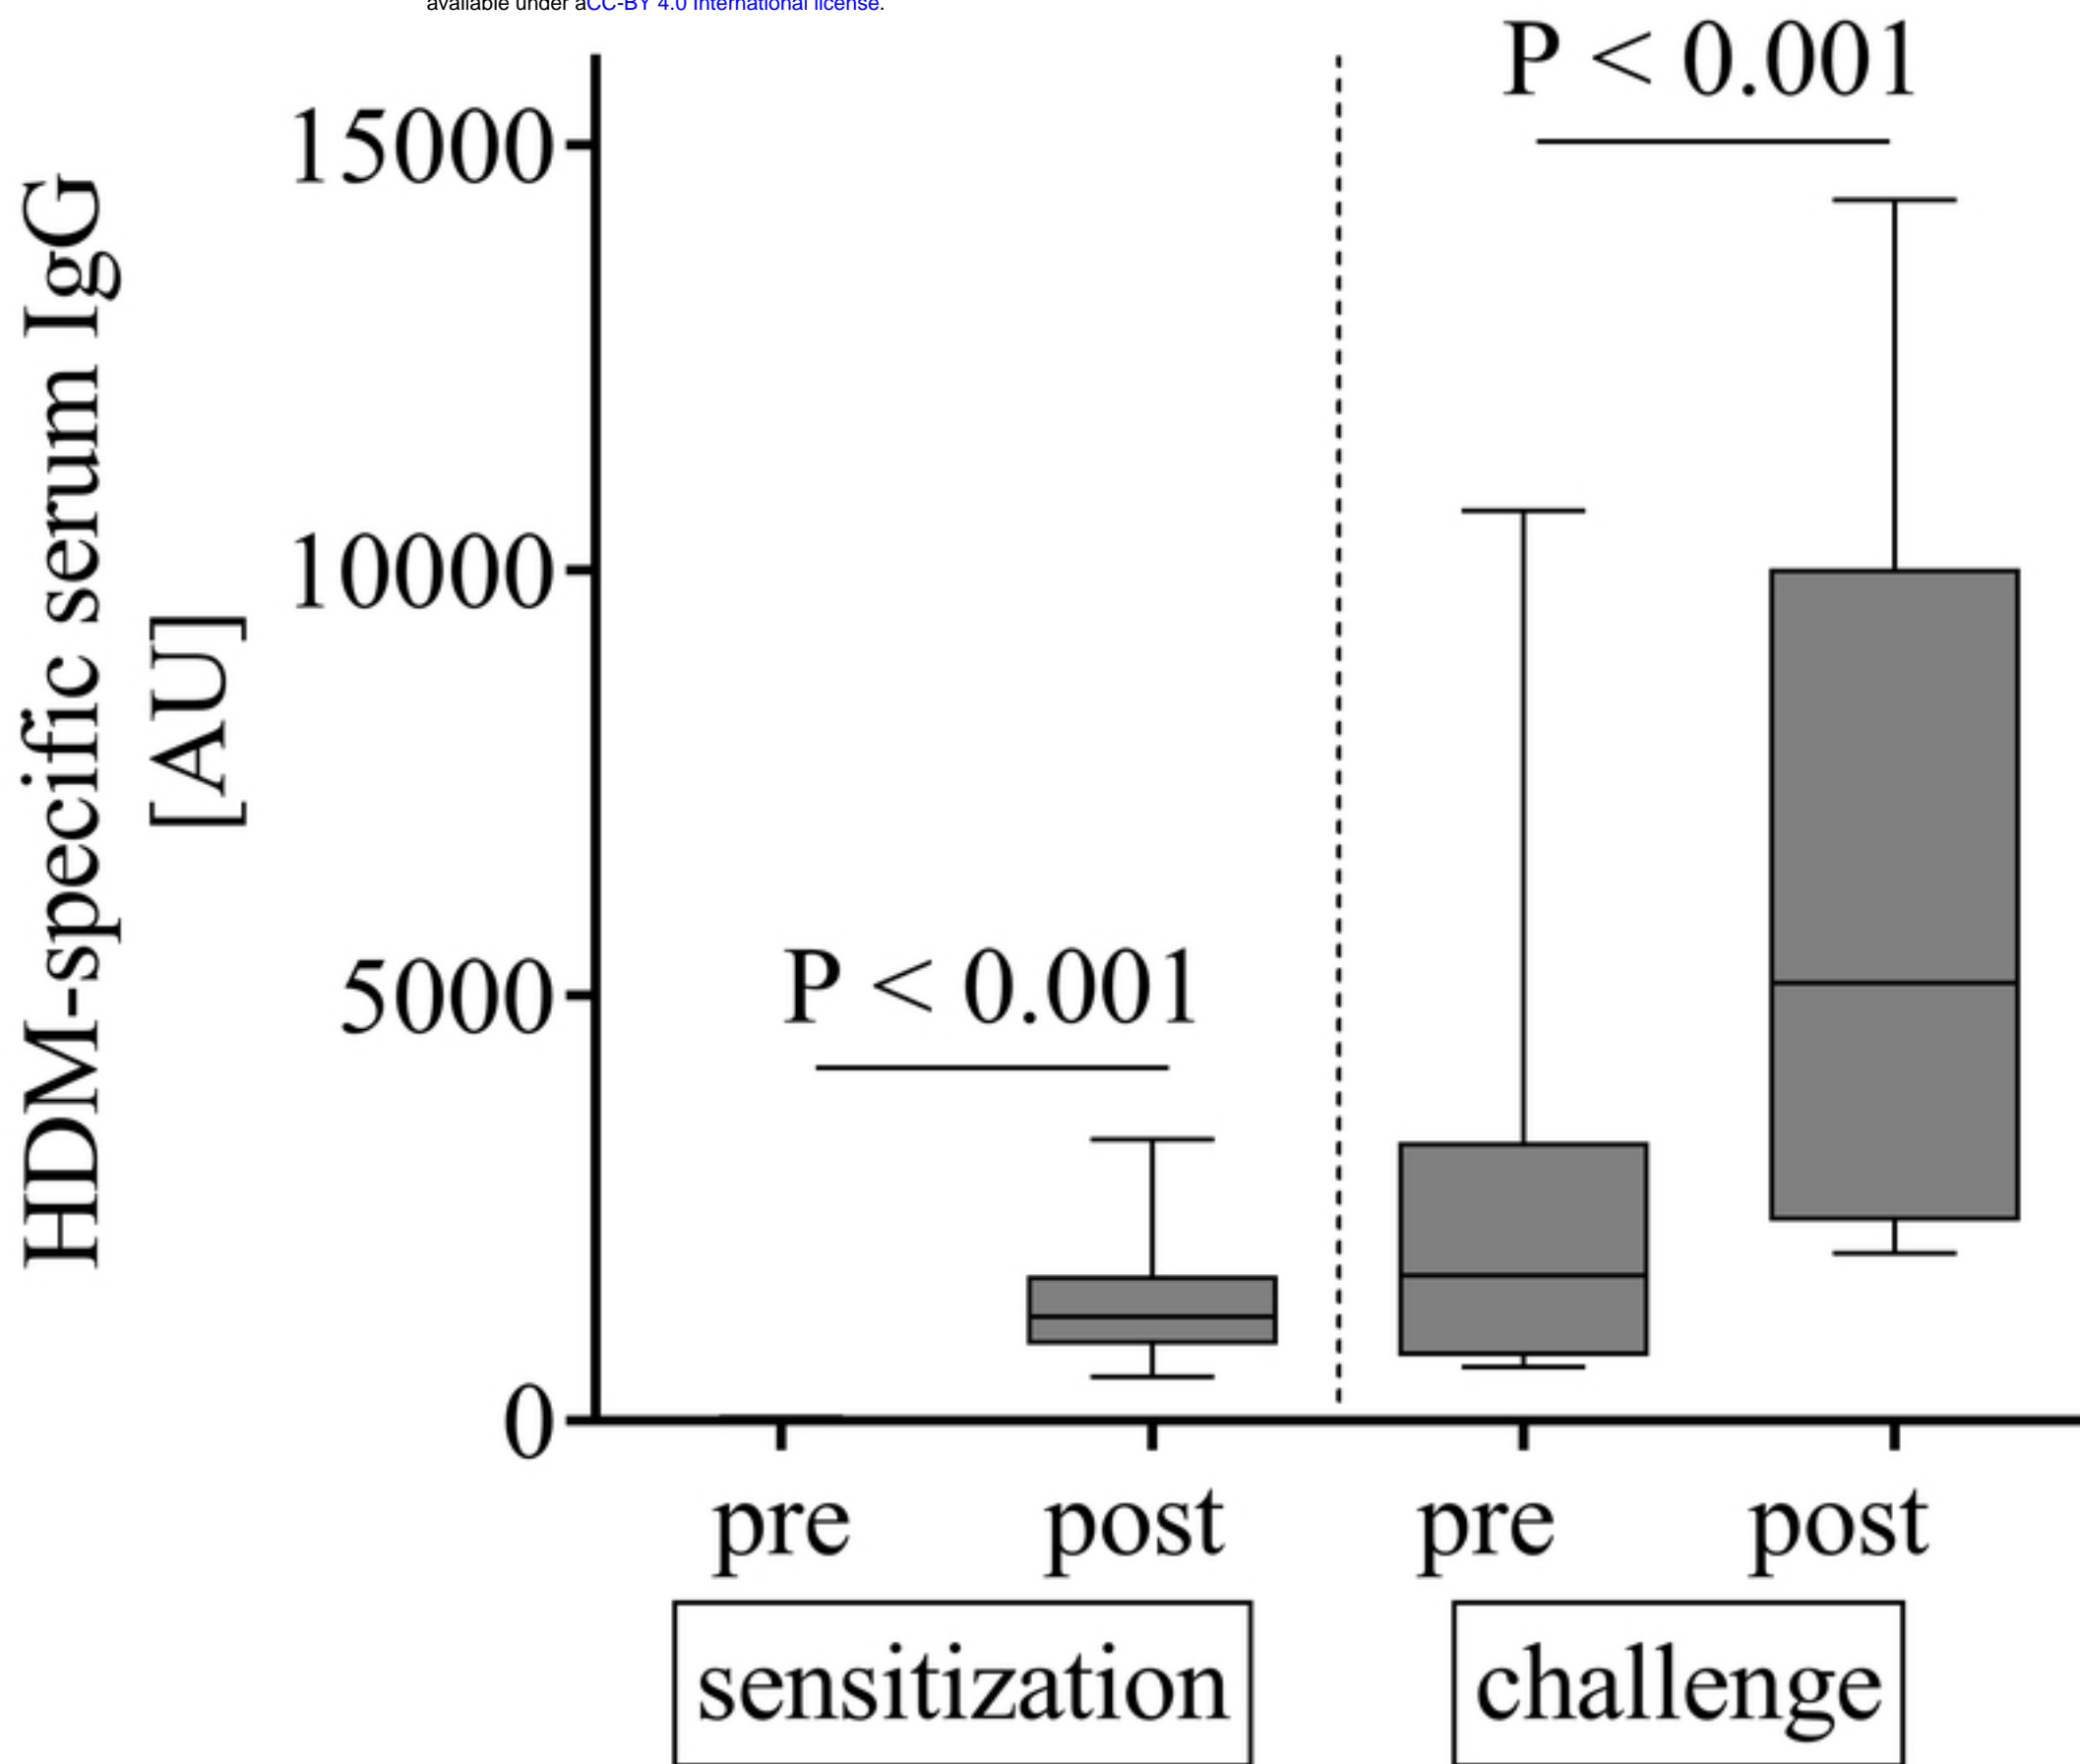

Figure

**(A)**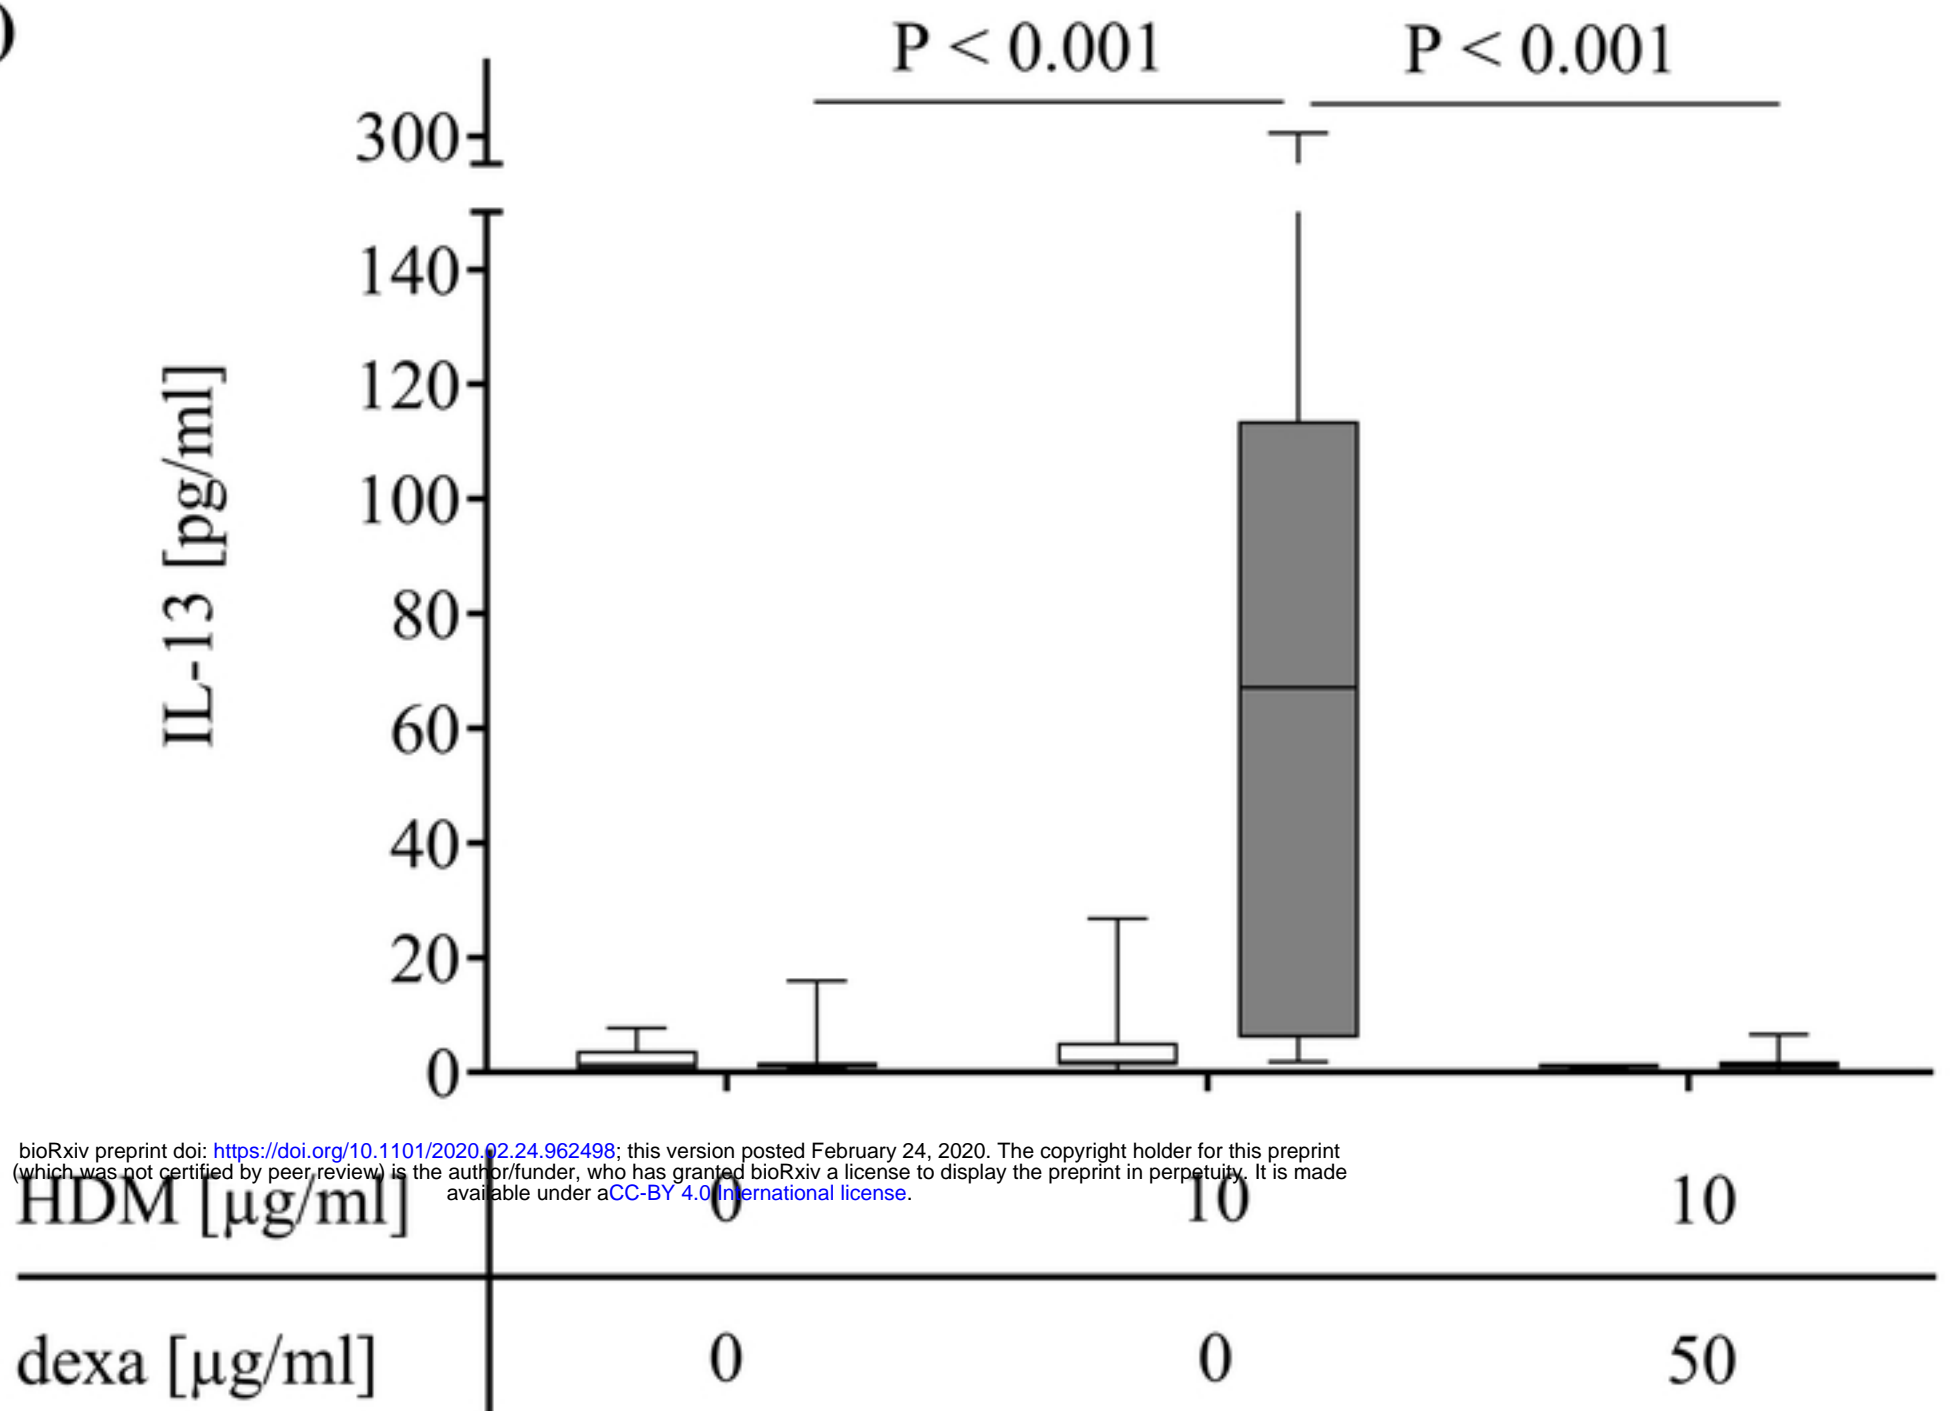**(B)**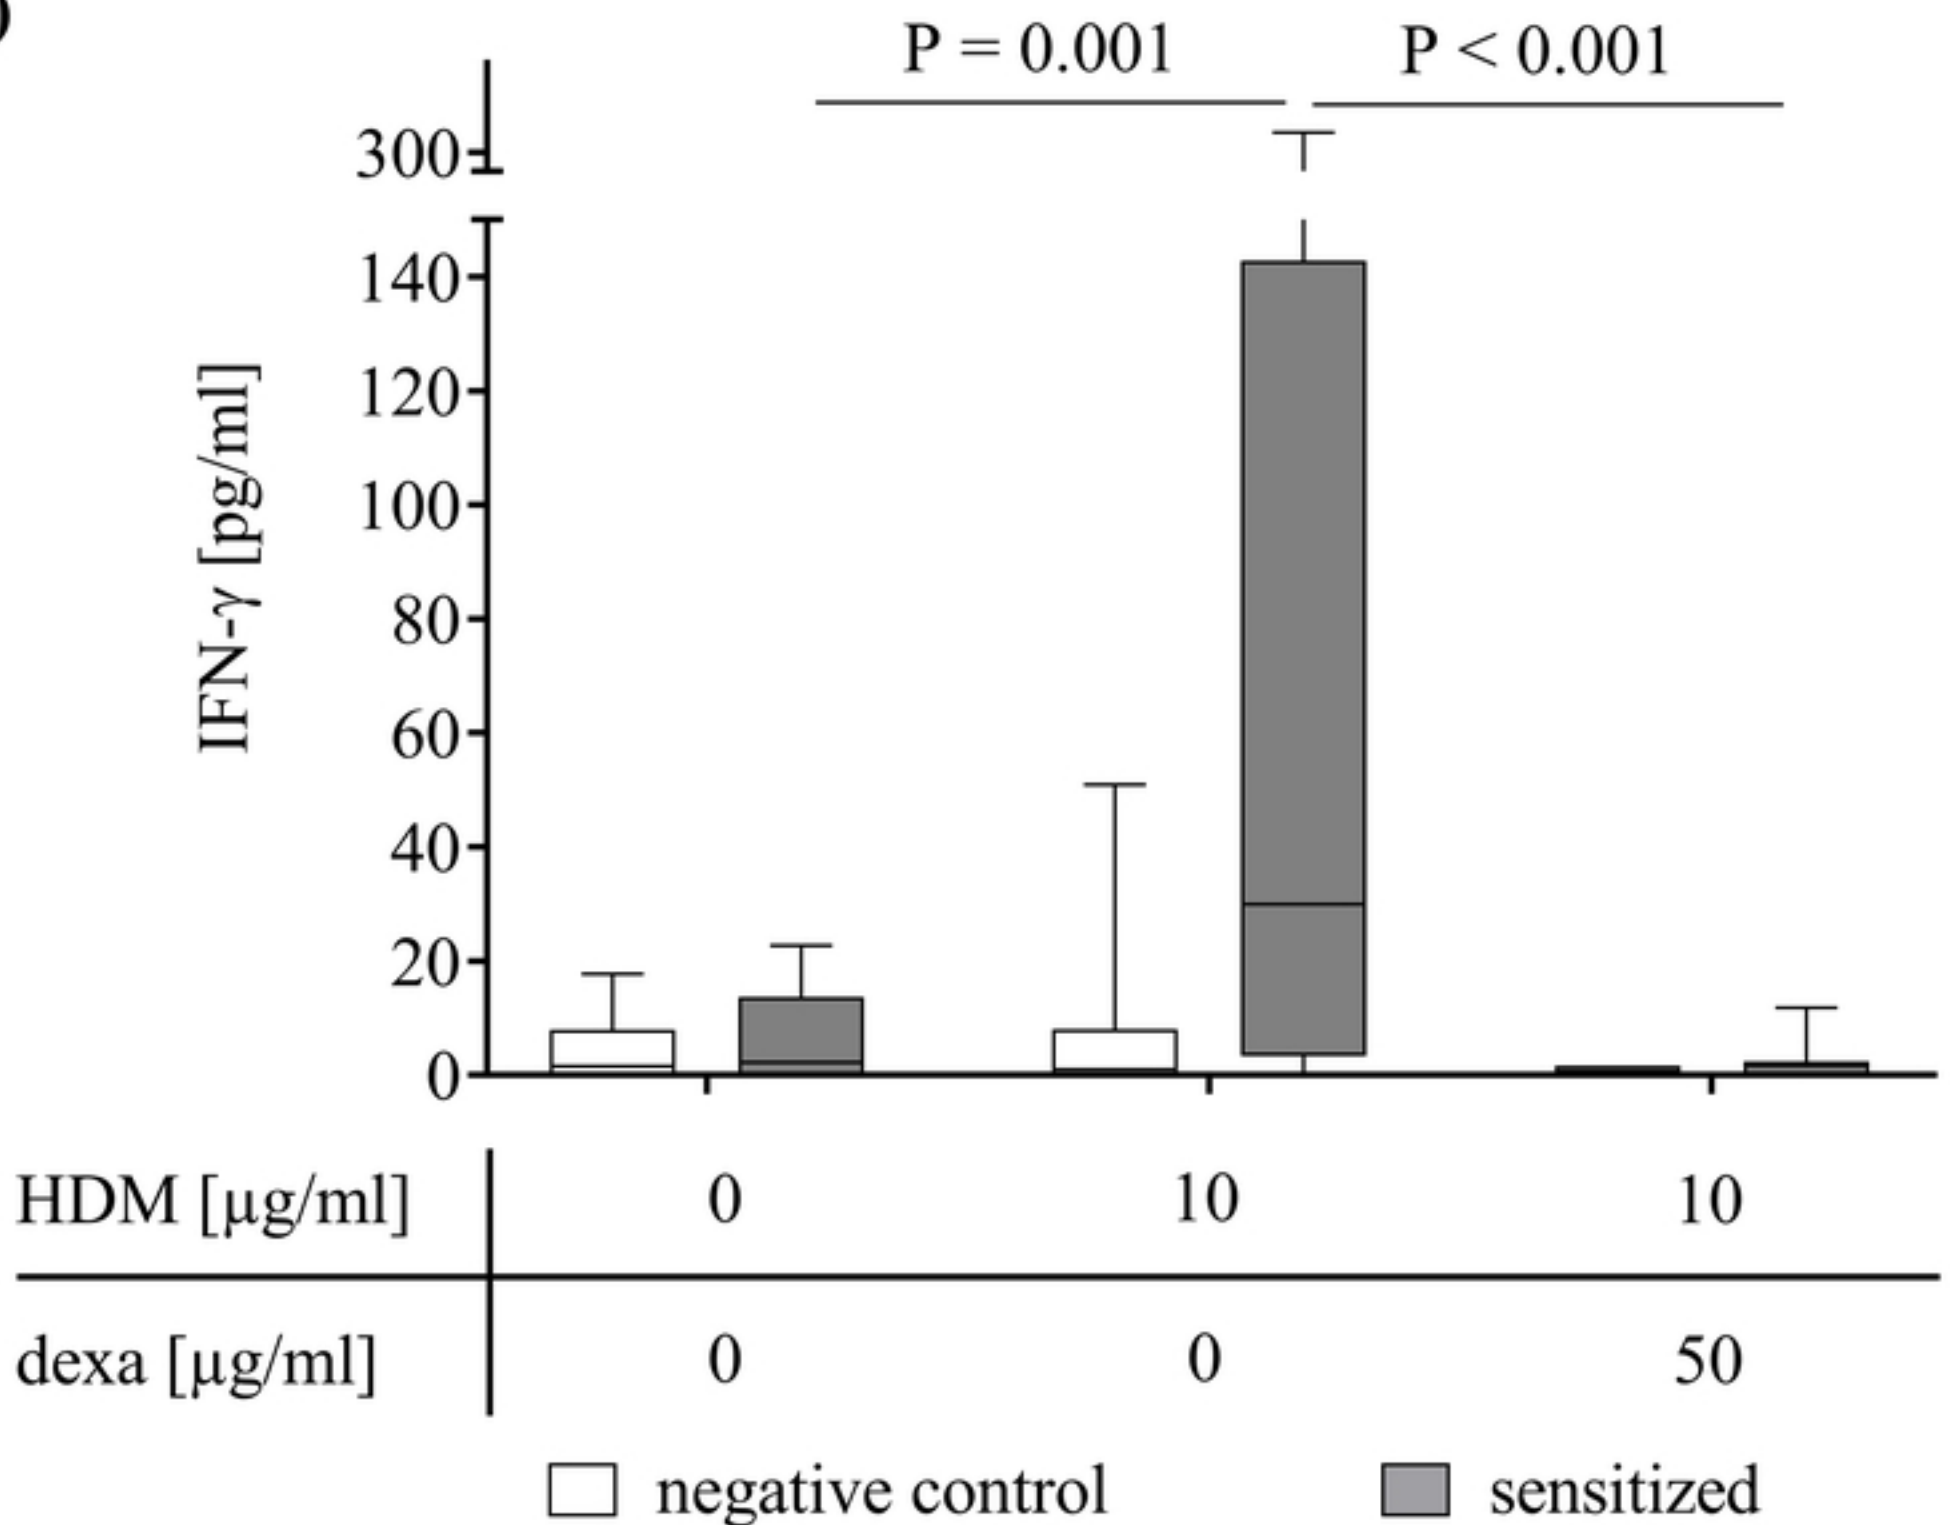

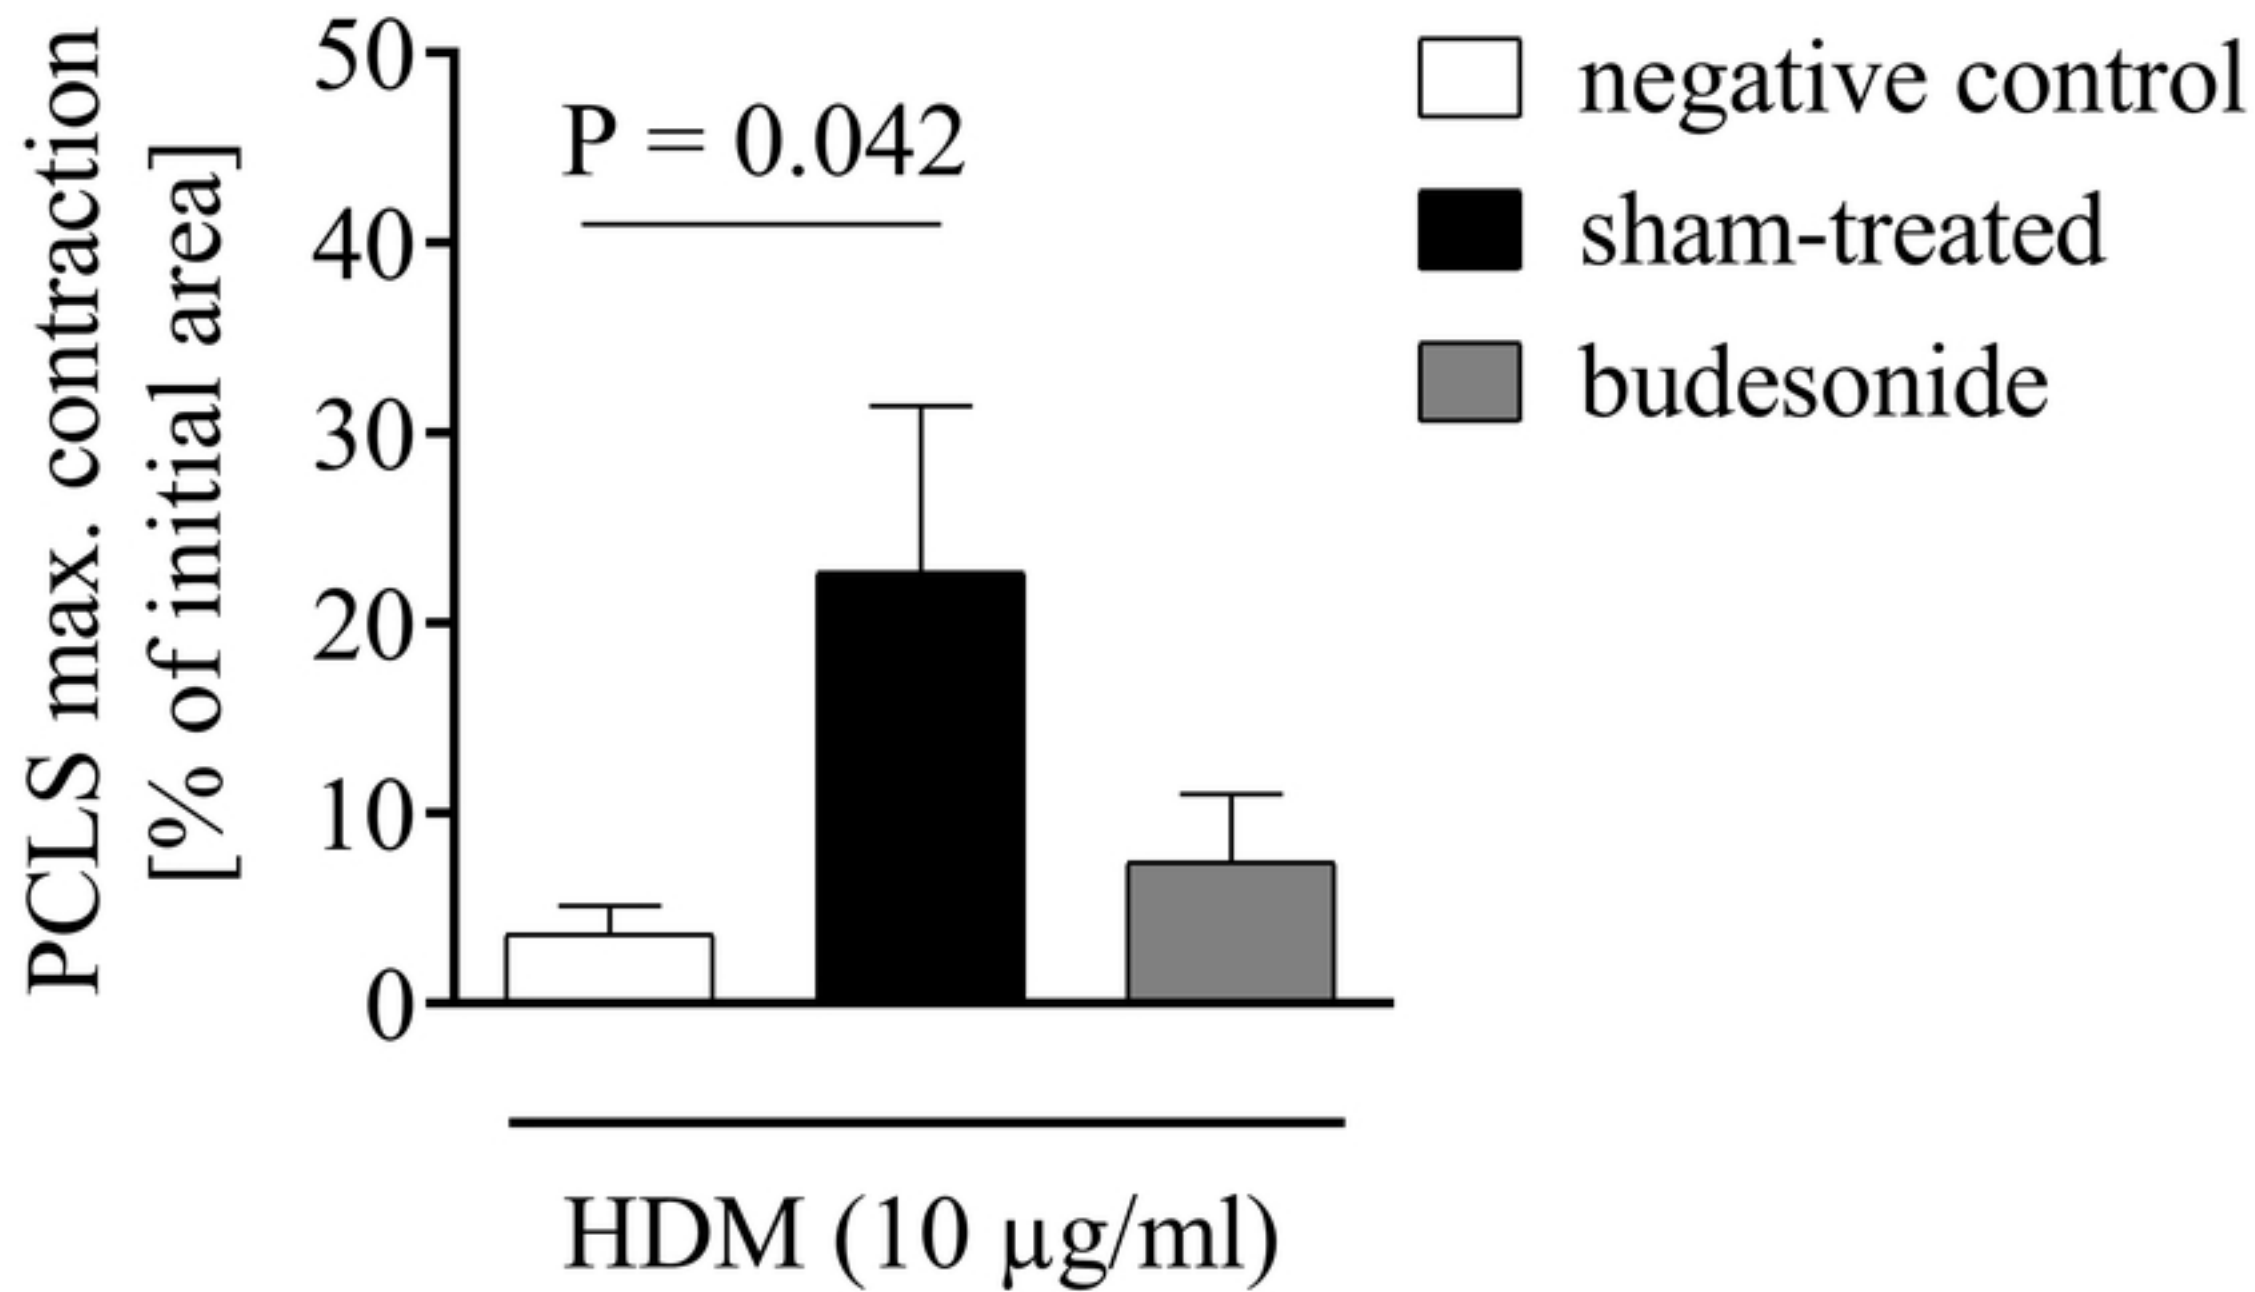

Figure
